1 **De novo determination of mosquitocidal Cry11Aa and Cry11Ba structures from**  
2 **naturally-occurring nanocrystals**

3  
4 **Authors:**

5 Guillaume Tetreau<sup>1,18</sup>, Michael R. Sawaya<sup>2,18</sup>, Elke De Zitter<sup>1,18</sup>, Elena A. Andreeva<sup>1,3,19</sup>, Anne-  
6 Sophie Banneville<sup>1,19</sup>, Nathalie Schibrosky<sup>2,4,19</sup>, Nicolas Coquelle<sup>5</sup>, Aaron S. Brewster<sup>6</sup>, Marie  
7 Luise Grünbein<sup>3</sup>, Gabriela Nass Kovacs<sup>3</sup>, Mark S. Hunter<sup>7</sup>, Marco Kloos<sup>3,8</sup>, Raymond G.  
8 Sierra<sup>7</sup>, Giorgio Schiro<sup>1</sup>, Pei Qiao<sup>9</sup>, Myriam Stricker<sup>3</sup>, Dennis Bideshi<sup>10,11</sup>, Iris D. Young<sup>6</sup>, Ninon  
9 Zala<sup>1</sup>, Sylvain Engilberge<sup>1</sup>, Alexander Gorel<sup>3</sup>, Luca Signor<sup>1</sup>, Jean-Marie Teulon<sup>1</sup>, Mario  
10 Hilpert<sup>3</sup>, Lutz Foucar<sup>3</sup>, Johan Bielecki<sup>8</sup>, Raphael de Wijn<sup>8</sup>, Tokushi Sato<sup>8</sup>, Henry Kirkwood<sup>8</sup>,  
11 Richard Bean<sup>8</sup>, Romain Letrun<sup>8</sup>, Alexander Batyuk<sup>7</sup>, Irina Snigireva<sup>12</sup>, Daphna Fenel<sup>1</sup>, Robin  
12 Schubert<sup>8</sup>, Ethan J. Canfield<sup>13</sup>, Mario M. Alba<sup>14</sup>, Frédéric Laporte<sup>15</sup>, Laurence Després<sup>15</sup>, Maria  
13 Bacia<sup>1</sup>, Amandine Roux<sup>16</sup>, Christian Chapelle<sup>17</sup>, François Riobé<sup>16</sup>, Olivier Maury<sup>16</sup>, Wai Li Ling<sup>1</sup>,  
14 Sébastien Boutet<sup>7</sup>, Adrian Mancuso<sup>8</sup>, Irina Gutsche<sup>1</sup>, Eric Girard<sup>1</sup>, Thomas R. M. Barends<sup>3</sup>,  
15 Jean-Luc Pellequer<sup>1</sup>, Hyun-Woo Park<sup>10,11</sup>, Arthur D. Laganowsky<sup>9</sup>, Jose Rodriguez<sup>2,4</sup>, Manfred  
16 Burghammer<sup>12</sup>, Robert L. Shoeman<sup>3</sup>, R. Bruce Doak<sup>3</sup>, Martin Weik<sup>1</sup>, Nicholas K. Sauter<sup>6</sup>, Brian  
17 Federici<sup>10</sup>, Duilio Cascio<sup>2</sup>, Ilme Schlichting<sup>3</sup>, Jacques-Philippe Colletier<sup>1\*</sup>.

18

19 **Abstract** (150 words)

20 Cry11Aa and Cry11Ba are the two most potent toxins produced by mosquitocidal *Bacillus*  
21 *thuringiensis* subsp. *israelensis* and *jegathesan*, respectively. The toxins naturally crystallize  
22 within the host; however, the crystals are too small for structure determination at synchrotron  
23 sources. Therefore, we applied serial femtosecond crystallography at X-ray free electron lasers  
24 to *in vivo*-grown nanocrystals of these toxins. The structure of Cry11Aa was determined *de*  
25 *novo* using the single-wavelength anomalous dispersion method, which in turn enabled the  
26 determination of the Cry11Ba structure by molecular replacement. The two structures reveal  
27 a new pattern for *in vivo* crystallization of Cry toxins, whereby each of their three domains  
28 packs with a symmetrically identical domain, and a cleavable crystal packing motif is located  
29 within the protoxin rather than at the termini. The diversity of *in vivo* crystallization patterns  
30 suggests explanations for their varied levels of toxicity and rational approaches to improve  
31 these toxins for mosquito control.

32

33 **Affiliations:**

34 <sup>1</sup>Univ. Grenoble Alpes, CNRS, CEA, Institut de Biologie Structurale, F-38000 Grenoble,  
35 France.

36 <sup>2</sup>UCLA-DOE Institute for Genomics and Proteomics, Department of Biological Chemistry,  
37 University of California, Los Angeles, CA 90095-1570.

38 <sup>3</sup>Max-Planck-Institut für medizinische Forschung, Jahnstrasse 29, 69120 Heidelberg,  
39 Germany.

40 <sup>4</sup>Department of Chemistry and Biochemistry, University of California, Los Angeles, CA 90095

41 <sup>5</sup>Large-Scale Structures Group, Institut Laue-Langevin, F- 38000 Grenoble, France.

42 <sup>6</sup>Molecular Biophysics and Integrated Bioimaging Division, Lawrence Berkeley National  
43 Laboratory, Berkeley, CA 94720.

44 <sup>7</sup>Linac Coherent Light Source, SLAC National Accelerator Laboratory, Menlo Park, CA 94025.

45 <sup>8</sup>European XFEL GmbH, Holzkoppel 4, 22869, Schenefeld, Germany.

46 <sup>9</sup>Department of Chemistry, Texas A&M University, College Station, TX 77845.

47 <sup>10</sup>Department of Entomology and Institute for Integrative Genome Biology, University of  
48 California, Riverside, CA 92521, USA.

49 <sup>11</sup>Department of Biological Sciences, California Baptist University, Riverside, California 92504,  
50 USA.

51 <sup>12</sup>European Synchrotron Radiation Facility (ESRF), BP 220, 38043 Grenoble, France.

52 <sup>13</sup>Mass Spectrometry Core Facility, School of Pharmacy, University of Southern California, Los  
53 Angeles, CA 90089, USA.

54 <sup>14</sup>Department of Pharmacology and Pharmaceutical Sciences, School of Pharmacy, University  
55 of Southern California, Los Angeles, CA 90089, USA.

56 <sup>15</sup>Univ. Grenoble Alpes, CNRS, LECA, F-38000, Grenoble, France.

57 <sup>16</sup>Univ. Lyon, ENS de Lyon, CNRS UMR 5182, Université Claude Bernard Lyon 1, Laboratoire  
58 de Chimie, F69342 Lyon, France.

59 <sup>17</sup>Polyvalan SARL, 15 parvis René Descartes, 69342 Lyon

60 <sup>18</sup>These authors contributed equally

61 <sup>19</sup>These authors contributed equally

62 \*Correspondance : [colletier@ibs.fr](mailto:colletier@ibs.fr) (J-P.C.)

63

## 64 Introduction (797 words)

65 The most commonly used biological insecticide for controlling mosquito vector  
66 populations is produced by the bacterium *Bacillus thuringiensis* subsp. *israelensis* (*Bti*)<sup>1</sup>. Its  
67 highly potent mosquitocidal activity is due to three nanocrystalline forms of four protoxins, viz.  
68 Cyt1Aa, Cry11Aa and co-crystallized Cry4Aa and Cry4Ba. These are produced during  
69 sporulation and are remarkably stable in a variety of conditions, but dissolve after ingestion  
70 under the high alkaline pH levels characteristic of the larval mosquito midgut<sup>2</sup>. Solubilized  
71 protoxins are activated by insect gut proteases enabling binding to gut cell membranes,  
72 subsequent oligomerization, and ultimately gut cell lysis leading to larval death<sup>2</sup>. *Bti* toxins are  
73 environmentally safe because they are much more specific for target mosquitoes than broad-  
74 spectrum chemical larvicides.

75 The most potent of the four *Bti* toxins is Cry11Aa, but it is poorly understood, in large  
76 part because unlike Cry4Aa, Cry4Ba, and Cyt1Aa, its structure is unknown. A related toxin  
77 produced by *Bt* subsp. *jegathesan* (*Btj*) is Cry11Ba, which is from seven to thirty-seven times  
78 more toxic than Cry11Aa against major mosquito vector species belonging to the genera  
79 *Aedes*, *Anopheles*, and *Culex* (Delecluse et al. 1995), and in some bacterial hosts appears to  
80 form slightly larger crystals. Cry11Ba's structure is also unknown, although it has been used  
81 in recombinant strains of *Bti* to improve mosquito activity significantly<sup>3,4</sup>. Thus, our goal was to  
82 determine the structures of Cry11Aa and Cry11Ba protoxins to help understand their  
83 mechanisms of crystallization that result in environmental stability and which could possibly  
84 yield structural insights for increasing the efficacy of these proteins for mosquito control.

85 Structure determination of Cry11Aa and Cry11Ba protoxins from natural nanocrystals  
86 requires cutting-edge technology. Conventional crystallography is limited to projects in which  
87 crystals are sufficiently large to mount and oscillate individually in a synchrotron X-ray beam.  
88 In the past, crystals of activated Cry4Aa<sup>5</sup>, Cry4Ba<sup>6</sup> and Cyt1Aa<sup>7</sup> attained sufficient size by  
89 growing these *in vitro* from toxins dissolved from natural nanocrystals and activating the toxins  
90 enzymatically. However, Cry11Aa and Cry11Ba do not recrystallize *in vitro* from dissolved  
91 nanocrystals<sup>8</sup>. Moreover, enzymatic activation is unwanted since our goal is to understand the  
92 pH-controlled mechanism of natural crystal dissolution. To observe the protoxin state in natural  
93 nanocrystals produced in bacterial cells, we applied serial femtosecond crystallography (SFX)  
94 at X-ray free electron lasers (XFEL)<sup>9-11</sup>. In the SFX experiment, high brilliance XFEL beam  
95 pulses, each lasting only ~10-50 fs, intercept a series of nanocrystals, one pulse-per-crystal,  
96 eliciting the strongest possible diffraction signal from each tiny crystal before it vaporizes, and  
97 producing a series of diffraction snapshots, later assembled into a full data set. Feasibility of  
98 this strategy had been demonstrated by the recent elucidation of the full bioactivation cascade  
99 of Cyt1Aa<sup>12</sup>.

100 Our success in determining the structures of Cry11Aa and Cry11Ba protoxins highlights  
101 the capability of XFEL sources to overcome limits of small crystal size. We relied on *de novo*  
102 phasing of the native SFX data because all attempts at molecular replacement (MR) failed  
103 despite detectable sequence similarity with ten structurally-determined members of the three-  
104 domain Cry  $\delta$ -endotoxin family<sup>13–15</sup>. We opted to derivatize our Cry11Aa nanocrystals with a  
105 recently-introduced phasing-agent, a caged-terbium compound, Tb-Xo4<sup>16,17</sup>. The phases  
106 obtained from single wavelength anomalous dispersion (SAD) were sufficient to reveal the  
107 Cry11Aa protoxin structure at 2.6 Å resolution and subsequently enable phasing of the  
108 Cry11Ba protoxin structure at 2.3 Å resolution by molecular replacement. In hindsight, we  
109 attribute the failure of early MR attempts to three extra  $\beta$ -strands in domain II which alter the  
110 relative orientation of the three domains in Cry11 toxins.

111 Our studies of Cry11Aa and Cry11Ba crystals reveal a new paradigm of molecular  
112 packing among Cry  $\delta$ -endotoxins reported thus far. In particular, the cleavable peptides that  
113 constitute important crystal contacts are located near the middle of the toxin sequence, rather  
114 than at the termini. Molecules pack in tetramer units, exhibiting D2 symmetry; these tetramers  
115 in turn pack in a body centered pattern (like a 3-dimensional brick-wall in which successive  
116 rows are offset by half a brick). To achieve this pattern, each of the three domains in a Cry11  
117 molecule packs with an identical domain from a symmetry related molecule: domain I packs  
118 with domain I, II with II, and III with III. Thus, each Cry11 domain fulfills two biological roles: a  
119 dimer interface manifested in the crystalline state, and a functional role manifested in the  
120 soluble state: target recognition (domain II), oligomerization (domain III) and pore formation  
121 (domain I)<sup>18</sup>. Differences in the size and composition of the three packing interfaces explains  
122 shape and size differences between Cry11Aa and Cry11Ba nanocrystals. Structure-guided  
123 site-directed mutagenesis verifies which residues affect crystal size, pH sensitivity of the  
124 crystal, and toxin folding. Our results elucidate the Cry11Aa and Cry11Ba bioactivation  
125 cascade and enable development of new, rational strategies for improved mosquito control.

126

127

128 **Results (4407 words)**

129 *De novo phasing of Cry11Aa and Cry11Ba structures by SFX*

130 *In vivo*-grown crystals of Cry11Aa and Cry11Ba protoxins exhibit distinct morphologies,  
131 which initially concealed a surprising conservation of their crystal packing patterns. Cry11Aa  
132 crystallizes as hexagonal plates and Cry11Ba crystallizes as larger bipyramidal crystals (Fig.  
133 1 a,b) as reported earlier<sup>4</sup>. These morphological distinctions cannot be attributed to differences  
134 in crystallization mechanisms in their parent organisms, *Bti* and *Btj*, since both protoxins were  
135 recombinantly produced in the same host organism, an acrySTALLIFEROUS strain of *Bti* (4Q7).  
136 Cry11Aa and Cry11Ba protoxins are expected to share structural resemblance to each other  
137 since the two sequences share 54% identity; however, 46% non-identity at the molecular level  
138 could easily produce large differences at the macroscopic level of crystal morphology.  
139 Moreover, the sequence of Cry11Ba is extended by 77-residues at its C-terminus, potentially  
140 also affecting differences in crystal packing (Supplementary Fig. 1). Interestingly, this  
141 extension has been identified as a low complexity region (LCR) by both CAST<sup>19</sup> and SEG<sup>20</sup>  
142 computational methods, which implicates the extension in the mechanism of crystal nucleation.  
143 At this point in our studies, the balance of evidence suggested that sequence divergence was  
144 likely to have erased the crystal packing pattern that early ancestors of today's Cry11Aa and  
145 Cry11Ba presumably once shared.

146 Our diffraction experiments yielded the first hint that Cry11Aa and Cry11Ba shared a  
147 conserved crystal packing pattern. We collected diffraction data from Cry11Aa and Cry11Ba  
148 nanocrystals injected in the vacuum chamber of the CXI-SC3 micro-focused beamline at the  
149 Stanford Linear Accelerator Center (SLAC) Linac Coherent Light Source (LCLS)<sup>21</sup> using a  
150 microfluidic electrokinetic sample holder (MESH)<sup>22</sup> (Cry11Ba crystals) or a gas-dynamic virtual  
151 nozzle (GDVN)<sup>23</sup> (Cry11Aa crystals). The underlying similarity in the packing of Cry11Aa and  
152 Cry11Ba became evident when their diffraction patterns were collected and indexed, revealing  
153 similarly sized unit cells ( $a \sim 58$ ;  $b \sim 155$ ;  $c \sim 171$  Å;  $\alpha = \beta = \gamma = 90^\circ$ ), albeit belonging to two different  
154 space groups:  $I222$  and  $P2_12_12_1$ , respectively (Table 1). Conservation of unit cell parameters  
155 hinted that this crystal packing pattern is special, evolved to perform a function more intricate  
156 than just storing protein.

157 To gain further insight into Cry11Aa and Cry11Ba crystal packing, we depended on *de*  
158 *novo* methods to solve the crystallographic phase problem. Initial attempts to acquire phases  
159 from homologous structures by molecular replacement (MR) failed, suggesting Cry11Aa and  
160 Cry11Ba contained novel features, not present in the PDB. Our search models included  
161 structures of Cry  $\delta$ -endotoxins homologs (exhibiting up to 26% sequence identity to our two  
162 targets) and homology models produced using Robetta<sup>24</sup> (<http://robeta.bakerlab.org/>) and  
163 SwissProt<sup>25</sup> (<https://www.ebi.ac.uk/uniprot/>). After MR failed, we turned to *de novo* phasing  
164 methods. We soaked Cry11 nanocrystals with conventional heavy atom derivatives including

165 gadolinium, gold, platinum, and mercury salts, but they failed to produce interpretable  
166 isomorphous or anomalous difference Patterson peaks. Finally, a recently introduced caged-  
167 terbium compound<sup>16,17</sup>, Tb-Xo4, produced a successful derivative of Cry11Aa (after a 30h  
168 soak at 10 mM concentration), and phases were determined by the single wavelength  
169 anomalous dispersion (SAD) method at 2.6 Å resolution (using anomalous signal up to 3.5 Å).  
170 Two Tb-Xo4 molecules were identified bound to the single Cry11Aa molecule in the  
171 asymmetric unit (isomorphous peaks at 23 and 9  $\sigma$ , and anomalous peaks at 33 and 8.1  $\sigma$ ,  
172 respectively; Supplementary Fig. 2a). The success of Tb-Xo4 can be partly ascribed to the  
173 dramatically high anomalous dispersion signal (*i.e.*  $f'$  and  $f''$ ) of terbium, but likely also stems  
174 from stronger binding of TbX04 to the protein owing to presence of an organic cage; indeed,  $f'$   
175 and  $f''$  of Gd and Tb are similar at the X-ray energy used for data collection (9 keV). Regardless,  
176 phases were of sufficient quality to reveal all Cry11Aa residues from N13 to the C-terminal  
177 K643.

178 The Cry11Ba structure was thereafter phased successfully by MR using the Cry11Aa  
179 structure as a search model. *A posteriori*, we discovered that two of the heavy atom  
180 compounds that we used for soaking actually did bind Cry11Ba (Supplementary Fig. 2b-c).  
181 Difference Fourier maps revealed 7-8  $\sigma$  peaks indicating Pt bound near Met 19 and 200, and  
182 Gd bound near Asp83 and Asp427 (Supplementary Fig. 2b). Surprisingly, however, there were  
183 no peaks in the anomalous difference Fourier maps. We speculate that if we had achieved  
184 higher heavy-atom occupancy and/or higher multiplicity in our measurements, the anomalous  
185 signal would have been strong enough to detect and perhaps used for phasing. Our MR-phase  
186 2.3 Å resolution map reveals two Cry11Ba molecules in the asymmetric unit. All residues are  
187 visible except for the N-terminus (residues M1-N16), two loops (residues G330-E340, and  
188 D352-I358) and the C-terminal extension (residues T654-K724). The lack of order in this  
189 extension is not surprising given the low complexity of its sequence.

190  
191 *Cry11 domain organization is similar to  $\delta$ -endotoxins, but exhibits some non-canonical features*

192 Cry11Aa and Cry11Ba structures maintain the three-domain organization characteristic  
193 of Cry  $\delta$ -endotoxins<sup>13,26</sup> (Fig. 1c, Supplementary Fig. 3). Domain I is implicated to form a pore  
194 in the target membrane. Like other Cry  $\delta$ -endotoxins it forms a seven- $\alpha$ -helix bundle; at the  
195 center of the bundle is  $\alpha 5$  (residues 146-170), surrounded by the remaining six helices. Domain  
196 II is implicated to recognize mosquito-specific receptors. It forms a  $\beta$ -prism composed of three-  
197  $\beta$ -sheets, wherein the first two  $\beta$ -sheets ( $\beta 4$ - $\beta 3$ - $\beta 2$ - $\beta 5$  and  $\beta 8$ - $\beta 7$ - $\beta 6$ - $\beta 9$ ) each adopts a Greek-  
198 key topology while the third  $\beta$ -sheet is three-stranded ( $\beta 1$ - $\beta 10$ - $\beta 11$ ). Domain III is implicated to  
199 oligomerize. It forms a  $\beta$ -sandwich of two antiparallel five-stranded  $\beta$ -sheets (*viz.*  $\beta 20$  –  $\beta 19$  –  
200  $\beta 22$  –  $\beta 17$  –  $\beta 4$  –  $\beta^{12}/\beta^{14}$  and  $\beta 15$  –  $\beta^{13}/\beta^{16}$  –  $\beta 23$  –  $\beta 18$  –  $\beta 21$  ) forming a jelly-roll

201 topology, whereby  $\beta^{12}/\beta^{14}$  and  $\beta^{13}/\beta^{16}$  are interrupted  $\beta$ -strands contributed by two non-  
202 consecutive short  $\beta$ -strands, which appose and intercalate one after the other onto  $\beta^4$  and  
203 between  $\beta^{15}$  and  $\beta^{23}$ , respectively (Figure 1d).

204 The closest homolog of known structure to Cry11 toxins is *Bt kurstaki* (*Btk*) Cry2Aa  
205 (PDBid: 1i5p), with a sequence identity of 26.6 and 23.6 % and main-chain rmsd of 3.7 and  
206 4.0 Å, with respect to Cry11Aa and Cry11Ba, respectively. As with Cry2Aa, the Cry11Aa toxins  
207 feature a long insert (27 residues in Cry2Aa; 21 residues in the Cry11 toxins) between strands  
208  $\beta^{10}$  and  $\beta^{11}$ , which together with domain-I  $\beta^1$ , form the third  $\beta$ -sheet of the domain-II  $\beta$ -prism.  
209 This insert, which features a short  $\alpha$ -helix ( $\alpha_h$ ) and a  $\beta$ -strand ( $\beta_h$ ), folds like a handle, and is  
210 therefore referred to as the  $\alpha_h\beta_h$ -handle, throughout the manuscript (Fig. 1c, Supplementary  
211 Fig. 3). The  $\alpha_h\beta_h$ -handle fastens domain II onto domain III through direct (e.g. in Cry11Aa,  
212 D443(OD2)-R502(NH2); D443(O)-R502(NH1); L447(N)-S503(O)) and water mediated H-  
213 bonds (T446(OG1)/T448(O)-Wat72(O)-R502(N); T448(OG1)/V499(O)-Wat308(O)-  
214 D501(OD1); T448(N)/L447(N)-Wat65(O)-S503(OG)/(O)), and enables the burying of domain-  
215 II  $\alpha^8$  at an interface formed by  $\alpha_h\beta_h$ ,  $\alpha^6$ - $\alpha^7$  (domain I),  $\beta^{10}$ - $\beta^{11}$  (domain II),  $\beta^{15}$  and the  $\beta^{13}$ -  
216  $\beta^{14}$  and  $\beta^{15}$ - $\beta^{16}$  loops (domain III), and the  $\alpha^9$  helix connecting domain II and domain III  
217 (D469-K478 in Cry11Aa) (Supplementary Fig. 4). The firm hold of  $\alpha^8$  enables the three  
218 domains to be more tightly packed in Cry2Aa and Cry11 toxins than in other Cry toxins (e.g.  
219 *Btt* Cry3Aa or *Btk* Cry1Ac). Additionally, strand  $\beta_h$  lays aside strand  $\beta^4$  thereby expanding –  
220 and consequently, stabilizing – the first  $\beta$ -sheet of domain II ( $\beta_h$ - $\beta^4$ - $\beta^3$ - $\beta^2$ - $\beta^5$ ). Also, alike  
221 Cry2Aa, the Cry11 toxins feature a smaller  $\beta$ -prism due to deletions in the second constitutive  
222  $\beta$ -sheet, namely between  $\beta^7$  and  $\beta^8$  (6 and 10 residues missing in Cry2Aa and Cry11 toxins,  
223 respectively), and between  $\beta^9$  and  $\beta^{10}$  (14 and 15 residues missing in Cry2Aa and Cry11  
224 toxins, respectively; Supplementary Fig. 3). The Cry11 toxin structures are, however, specific  
225 in that a 36 to 38 residue insertion is observed between strands  $\beta^4$  and  $\beta^5$ , contributing an  
226 additional  $\beta$ -strand to the first  $\beta$ -sheet of domain-II – thereafter referred to as the  $\beta_{pin}$  (Fig. 1c).  
227 As the  $\beta_{pin}$  lays along a two-fold axis, two large  $\beta_h$ - $\beta^4$ - $\beta^3$ - $\beta^2$ - $\beta_{pin}$  –  $\beta_{pin}$ - $\beta^2$ - $\beta^3$ - $\beta^4$ - $\beta_h$  sheet are  
228 formed between symmetry related dimers (AC or BD, interface #3), yielding the crystallizing  
229 tetramer (Fig. 2b, e). We noted earlier that the BSA at the tetramerization interface is 33%  
230 lower in Cry11Ba, pointing to higher flexibility; this hypothesis is supported by the absence of  
231 interpretable electron density for residues at the N-terminus (330-340) and C-terminus (352-  
232 360) of the  $\beta_{pin}$  in the Cry11Ba structure. Also noteworthy is that Cry11 toxins feature a  
233 conserved N/D-DDLGITT insertion between  $\beta^{21}$  and  $\beta^{22}$ , and deletions (>3 residues) between  
234  $\alpha^3$  and  $\alpha^3$  (-5 and -8 residues with respect to *Btk* Cry2Aa and *Bt tenebrionis* (*Btt*) Cry3Aa),  
235 and  $\beta^{20}$  and  $\beta^{21}$  (-10 and -9 residues with respect to *Btk* Cry2Aa and *Btt* Cry3Aa). Altogether,  
236 these changes render Cry11 toxins uniquely large from the structural standpoint, with predicted

237 radii of gyration of 27.5 and 26.7 Å for Cry11Aa and Cry11Ba, compared to 25.0 and 25.6 Å  
238 for *Btk* Cry2Aaa and *Btt* Cry3aa, respectively.

239

240 *All domains engage in producing the in vivo crystal lattice.*

241 Examination of packing interfaces reveal that all three domains are involved in the  
242 formation and stabilization of Cry11Aa and Cry11Ba nanocrystals. The *in vivo* crystallization  
243 pathway can be best traced from Cry11Aa crystals, which feature a single monomer per  
244 asymmetric unit and build on six packing interfaces burying a cumulated surface area (BSA)  
245 of 3514.5 Å<sup>2</sup>, corresponding to 13.1 % of the total protein area. The main building block of  
246 Cry11Aa crystals consists of a tetramer with a total BSA of 9663.0 Å<sup>2</sup> and a predicted binding  
247 energy of -12.5 kcal.mol<sup>-1</sup> at pH 7 by PISA<sup>27</sup> (Fig. 2a,b). Supported by two of the six packing  
248 interfaces, the tetramer builds from the cross-association (AC or BD; interface #3) of two  
249 dimers (AB or CD) along the 2-fold axis contributed by domain II (Fig. 2b). Each dimer is itself  
250 composed of monomers associated along another 2-fold axis contributed by domain III and by  
251 strand β<sub>4</sub> and the β<sub>10</sub>-β<sub>11</sub> hairpin (P433-P457) in domain II. The tetramer is further stabilized  
252 by a minor interface between apices from domain II (interfaces AD or BC; interface #6).  
253 Crystals grow from the piling in a honeycomb brick-wall fashion of such tetramers, as a result  
254 of a face-to-back interaction between domains I from symmetry-related molecules (interface  
255 #2; Fig. 2c). Cry11Aa crystals are further cemented by two additional minor interfaces. The  
256 first involves the apex of the second β-sheet of domain II (interface #5) from facing monomers  
257 in each dimer (AD or BC) of the stable tetramer. The second occurs between the α<sub>3</sub>-α<sub>4</sub> loop  
258 of domain I in one tetramer and the apex of the second β-sheet of domain II in another tetramer  
259 (interface #4).

260 The similarity between the packing of Cry11Aa and Cry11Ba crystals makes it  
261 reasonable to propose that the latter also forms from the assembly of tetramers (Fig. 2d, e, f),  
262 despite failure of PISA to identify a (meta-)stable building block for Cry11Ba crystals. In these,  
263 two molecules are found in the asymmetric unit, associated through the face-to-back interface  
264 between domains described above for Cry11Aa monomers (interface #2; Fig. 2f). The BSA at  
265 this interface is 1135.1 Å<sup>2</sup>, *i.e.* 18% higher than in Cry11Aa (Fig. 2g). However, BSAs at the  
266 interfaces formed by domains III and II, which respectively associate monomers into a dimer  
267 and dimers into a tetramer, are 53 and 30 % lower than the homologous interfaces in Cry11Aa  
268 (Fig. 2e, g), in part due to missing residues at interface 3 contributed by domain II. Thus, the  
269 intermolecular contact between piled tetramers is larger in the Cry11Ba crystals, despite an  
270 overall looser packing of monomers in the crystals, with an average BSA at crystal contacts of  
271 2607.3 Å<sup>2</sup> per monomer (74% of that in Cry11Aa crystals), corresponding to 10.2 % of the total  
272 protein area. The increased BSA between tetramers (contributed by the large face-to-back  
273 interface between domains I), and the presumably higher flexibility in the Cry11Ba tetramers,



274 could be at the origin of Cry11Ba packing into larger three-dimensional crystals. Regardless,  
275 our structures evidence that each domain exhibits a dual role in Cry11 toxins, namely the  
276 formation and stabilization of *in vivo*-grown nanocrystals, and execution of a domain specific  
277 function. The latter comprises pore formation (domain I), receptor-recognition and membrane-  
278 insertion (domain II), and oligomerization and stabilization of the toxic pore conformation  
279 (domain III) <sup>26</sup> .

280

### 281 *Drastic conformational changes drive crystal dissolution*

282 We sought to characterize the conformational changes that ensue pH elevation,  
283 preceding dissolution of the crystals in the mosquito larvae gut <sup>28</sup>. As the crystals are naturally  
284 labile at pH 11, we aimed at collecting data from crystals soaked at a lower pH, hypothesizing  
285 that early conformational changes would show but the crystal packing still hold. In the case of  
286 Cry11Aa crystals, diffraction quality was decreased dramatically at pH values of 9.5 (CAPS  
287 buffer, glycerol 30%) and above, preventing collection of a sufficiently large number of  
288 diffraction patterns to produce a high-pH dataset. Hence, large conformational changes occur  
289 in Cry11Aa at pH as low as 9.5, opposing diffraction quality, despite crystals dissolving as of  
290 pH 11 only (Fig. 3a). In the case of Cry11Ba, ~3 Å diffraction was preserved up to pH 10.4  
291 (Table 1). Comparison between the refined 'pH10.4' and 'pH6.5' structures points to large inter-  
292 domain rearrangements induced by pH increase. Detailed analysis of structural changes at  
293 the side chain level was yet prevented by the limited resolution of the 'pH10.4' dataset. A 1%  
294 unit cell contraction, and hence tighter crystal packing, was observed in the 'pH10.4' crystals  
295 in comparison to the pH 6.5 crystals. However, because a higher glycerol concentration was  
296 used for injection of Cry11Ba crystals at pH 10.4, we cannot exclude that unit cell contraction  
297 might be caused by crystal dehydration.

298

### 299 *Crystals are made of full-sized monomers of Cry11 toxins*

300 In both Cry11Aa and Cry11Ba toxins, the  $\beta_{\text{pin}}$  (residues E339-Q350 and I341-Y350,  
301 respectively) is a ~10-residue long  $\beta$ -strand that hydrogen-bonds with a two-fold related  
302 symmetry mate, contributing the interface that assembles dimers (AC and BD) into stable  
303 tetramers. This strand is bordered on each side by the only two loops that have disordered  
304 electron density in Cry11Ba (missing residues G330-E340 and D352-I358) and are  
305 comparatively difficult to interpret in Cry11Aa (F330-D334 and Q350-E355), respectively. As  
306 Cry11Aa N335-Y349 and Cry11Ba I341-N351 regions match the enzymatic cleavage site  
307 known to generate the two activated fragments of ~32 and ~36 kDa <sup>29,30</sup> upon proteolytic  
308 activation in the mosquito larvae gut, we asked whether disorder in the F330-D334 (G330-  
309 E340) and Q350-E355 (D352-I358) loops serves the purpose of enabling facilitated access of  
310 proteases to Cry11Aa (Cry11Ba) cleavage sites or if each monomer occurs in natural crystals

311 as two polypeptide chains cleaved prior or during crystal formation. SDS PAGE analysis of  
312 Cry11Aa (12% gels, heating at 95°C for 5 min, presence of DTT and SDS; Supplementary Fig.  
313 5) resulted in a major band ~70 kDa, in line with previous reports<sup>31–33</sup>. As the denaturing  
314 treatment would have broken any disulfide-bridge or non-covalent interactions that could  
315 maintain cleaved fragments together, this result suggests that Cry11Aa occurs in crystals as  
316 a full monomer. We further verified this hypothesis by use of MALDI TOF mass spectrometry.  
317 In MALDI mass spectra collected after direct solubilization of the natural crystals in sinapinic  
318 acid matrix in presence or absence of DTT, we observed main peaks at  $m/z$  of 72246 and  
319 72235 (mass error:  $\pm 100$  Da) and 36154 and 36129 Da, respectively, in agreement with  
320 expected molecular masses for singly- and doubly- charged ions of a full-size monomer  
321 (expected mass: 72.349 kDa) (Uniprot accession number: P21256; Supplementary Fig. 6).  
322 However, because proteolytic activation is as well expected to yield a 36 kDa fragment, in  
323 addition to a 32 kDa fragment for which a minor peak was present in the MALDI-TOF mass  
324 spectra, we resorted to native mass spectrometry to assert that the ~72.240 and ~36.140 kDa  
325 peaks originated from the same species – rather than being indicative of the crystallization of  
326 proteolytic products. With this approach, we could confirm that upon dissolution of Cry11Aa  
327 crystals, a 72.345 kDa fragment is released, corresponding to the full-size monomer  
328 (Supplementary Fig. 7a). Moreover, both incubation of solubilized toxin at room temperature  
329 (RT) for 2 h (Supplementary Fig. 7b) and use of increased collision energy (Supplementary  
330 Fig. 7c, d) failed at yielding a signature for the two polypeptides that would have been  
331 generated if cleavage at position 329 had occurred. We conclude that natural crystals of  
332 Cry11Aa, and possibly Cry11Ba, grow from the addition of full-size monomers, and that  
333 disorder in the F330-D334 (G330-E340) and Q350-E355 (D352-I358) loops could serve the  
334 purpose of enabling facilitated access of proteases to Cry11Aa (Cry11Ba) cleavage sites.  
335 Considering proteinase K as a surrogate analogue for mosquito larvae gut proteases<sup>34</sup>, one  
336 would expect the  $\beta_{pin}$  to be released upon proteolytic activation, suggesting that the role of the  
337 latter is to promote *in vivo* crystallization. We note that other cleavage sites are predicted,  
338 which would release the first six residues and last two  $\beta$ -strands ( $\beta_{22}$ - $\beta_{23}$ ), as well as rescind  
339 the covalent association between domain I and domains II and III, thereby leaving non-covalent  
340 interactions surfaces as the sole glue between them.

#### 341 342 *Mutagenesis to alter crystal formation and dissolution*

343 We proposed earlier that the packing of Cry11Ba into slightly larger crystals than  
344 Cry11Aa could stem from differences in the extent and nature of the interfaces which support  
345 dimerization, tetramerization and piling of tetramers into crystals (Fig. 2). Considering recent  
346 evidence linking LCR regions with diverse functions including chaperoning<sup>35</sup> and reversible  
347 oligomerization, we further asked whether or not presence of the 77-residue LCR region at the

348 C-terminus of Cry11Ba plays a complementary role in the promotion of crystal formation. A  
349 chimera was therefore designed, coined C11AB, wherein the LCR region of Cry11Ba was  
350 fused to the C-terminal end of Cry11Aa (Material and Methods; Supplementary Fig. 8a).  
351 C11AB was produced at the expected size but at a lower yield than Cry11Aa WT  
352 (Supplementary Fig. 8b). Atomic force micrographs (AFM) revealed the presence of multiple  
353 needle-like inclusions in the parasporal envelope encasing the crystals, suggesting that  
354 presence of Cry11Ba-LCR at the C-terminal end of Cry11Aa favors nucleation, but not crystal  
355 growth (Supplementary Fig. 8c).

356 Seven Cry11Aa mutants were additionally designed with the aim to probe the  
357 involvement of Cry11Aa intra- and inter-molecular interfaces in toxin stability, crystal formation  
358 and dissolution. Each mutant was designed to challenge a specific interface and served as a  
359 coarse proxy to evaluate its pH sensitivity and putative participation in the crystal dissolution  
360 mechanism. First, we asked whether the intra-chain stabilization of  $\alpha 8$  at an interface  
361 contributed by the three domains (namely,  $\alpha_h\beta_h$ ,  $\alpha 6$ - $\alpha 7$ ,  $\alpha 9$ ,  $\beta 10$ ,  $\beta 11$ ,  $\beta 15$  and the  $\beta 13$ - $\beta 14$   
362 and  $\beta 15$ - $\beta 16$  loops) could play a role in crystal dissolution. Residues central to this interface  
363 are Y272, D514 and D507, which H-bond to one another and to Y203, R222, T249, S251  
364 through direct and water-mediated interactions (W253 and W267), connecting the three  
365 domains (Supplementary Fig. 9a, Supplementary Table 1a). Upon pH elevation, Y272, D514  
366 and D507 are all expected to be deprotonated, which should result in electrostatic repulsion  
367 and thence dissociation of the three domains. To test the hypothesis, we produced three  
368 Cry11Aa mutants intended to eliminate pH sensitivity of the above-described H-bonds. Neither  
369 did the Y272Q nor D507N-D514N mutations impact the overall stability of the toxin, in the  
370 soluble or crystalline form (Fig. 3b), but their combination in the triple Y272Q-D507N-D514N  
371 mutant resulted in an unexpected abolishment of the ability of Cry11Aa to form crystals *in vivo*  
372 – possibly due to improper folding (Supplementary Fig. 10). The Y272Q mutation had no effect  
373 on the pH sensitivity of Cry11Aa crystals, while only a minor effect was seen with the  
374 D507N+D514N mutant (Fig. 3a). Thus, pH-induced deprotonation of amino acids involved in  
375 the stabilization of  $\alpha 8$  at the interface between the three domains does not play a role in the  
376 initial steps of crystal dissolution, possibly because of their deep burial at the interface. We  
377 note that the above-mentioned residues and their interactions are all strictly conserved in  
378 Cry11Ba (viz. Y273, D518, D511, Y203, R222, T249, S251, W253 and W268).

379 We then focused on Cry11Aa E583, a residue siting at the intramolecular interface  
380 between domain I and domain III. This  $\beta 21$  residue, condemned to be anionic at higher pH,  
381 takes part in the water-mediated hydrogen bond network that connects  $\alpha 6$  and  $\alpha 7$  from domain  
382 I with domain III (Supplementary Fig. 9b, Supplementary Table 1b). We therefore asked  
383 whether or not suppression of the pH-sensitivity of the network would stabilize the monomer  
384 at high pH, thereby reducing the pH sensitivity of the crystals. This was indeed the case, with

385 an SP<sub>50</sub> (pH at which 50% of crystals are dissolved) of  $12.6 \pm 1.0$  for crystals of the E583Q  
386 mutant, compared to  $11.2 \pm 1.0$  for WT Cry11Aa crystals (Fig. 3a), and a dissolution profile  
387 characterized by a reduced slope with no visible plateau up to pH 14. Thus, the alteration of  
388 protonation state of residues and water molecules at the intramolecular interface between  
389 domain I and domain III may be involved in the early step of Cry11Aa crystal dissolution. In  
390 Cry11Ba (G587), which displays a similar SP<sub>50</sub> of 11.5 (Supplementary Fig. 11), this residue  
391 is substituted for glycine suggesting a different mechanism of pH-induced intramolecular  
392 separation of domain I and domain III, in Cry11Ba – or at least the involvement of additional  
393 residues at the interface.

394 Crystal contacts were also investigated. We first tampered with the interface enabling  
395 the piling in a honey-comb fashion of Cry11Aa tetramers (Fig. 2c, interface #2), by introducing  
396 a F17Y substitution, intended to induce electrostatic repulsion with the negatively charged  
397 D180 (distance D180(OD1) - F17(CZ) of 3.3 Å), due to deprotonation of its hydroxyl group  
398 upon pH increase (Supplementary Fig. 9c). As expected, crystals of the F17Y mutant were  
399 found to be more sensitive to increases in pH, with crystals starting to dissolve at pH as low  
400 as ~9.5 and an SP<sub>50</sub> of  $10.6 \pm 1.0$  (Fig. 3a). The dissolution profile of F17Y crystals is again  
401 characterized by a reduced slope, as compared to WT crystals, explaining that the plateau is  
402 nonetheless reached at the same pH (~pH 11.6). Nevertheless, the result suggests that  
403 dissolution of Cry11Aa crystals can be accelerated by separation of the tetramers associated  
404 through interface #2. The F17Y mutation was also found to challenge crystal formation,  
405 yielding crystals far smaller than their WT counterparts. We note that F17, D180 and the H-  
406 bond between them are strictly conserved in Cry11Ba; hence, the importance of interface 2 for  
407 crystal formation and dissolution could be extendable to crystals formed by Cry11Ba.

408 Next, we challenged the role of the dimerization interface (Fig. 2b interface #1). Recall  
409 that BSA at this interface, contributed by domain III from facing monomers, is 53% lower in  
410 Cry11Ba than in Cry11Aa. Furthermore, only nine hydrogen bonds and two salt bridges  
411 support the interface in Cry11Ba, compared to 20 hydrogen bonds and 10 salt bridges in  
412 Cry11Aa. Y449 is positioned in the central part of the interface, and while not involved in direct  
413 H-bonding to other protein residues, supports a large H-bond network that interconnects  
414 waters and residues from facing monomers in the dimer (Supplementary Fig. 9d,  
415 Supplementary Table 1c). Hence, we investigated whether deprotonation of Y449 in the middle  
416 of the interface would significantly affect crystal dissolution by engineering of a Y449F  
417 mutation. Only a minor effect on crystal dissolution was observed (Fig. 3a), yet the mutation  
418 was detrimental to the protein stability (Fig. 3b), resulting in the growth of crystals of different  
419 size and shape (Fig. 3c).

420 Finally, we introduced a Y349F mutation in the  $\beta_{\text{pin}}$ , hypothesizing that suppression of  
421 its pH-sensitive H-bond to E295(OE1) in the adjacent strand  $\beta_2$  would disturb the  $\beta_{\text{pin}}$  fold and

422 destabilize the tetramerization interface (Fig. 2b interface #3, Supplementary Fig. 9e,  
423 Supplementary Table 1d), thereby triggering crystal dissolution. This expected effect was not  
424 observed, with crystals of the mutant displaying the same pH-induced dissolution profile as  
425 those of the WT. Nonetheless, smaller crystals were observed whose thermal stability was  
426 affected (Figure 3 and Supplementary Fig. 12), indicating that reduced stabilization of the turn  
427 preceding the  $\beta_{\text{pin}}$  not only impacts folding and stability of the toxin, but as well its piling into  
428 crystals – probably due to reduced tetramerization. Of note, Y349 is conserved in Cry11Ba  
429 where it H-bonds to P362(O).

430 Of all the single and double mutants we investigated, the Y349F mutation is that which  
431 results in the smallest crystals, closely followed by F17Y and E583Q. The Y449F mutant,  
432 however, exhibits the most noticeable change in shape compared to WT Cry11Aa. To evaluate  
433 the significance of these changes, we characterized the distribution in size of crystals of  
434 Cry11Aa-WT, Y449F, F17Y and E583Q using AFM (Fig. 3d). All three mutants had a  
435 significantly reduced volume compared to WT Cry11Aa, due to a reduced thickness of the  
436 crystals (Fig. 3d).

437

#### 438 *Probing crystalline order of the Cry11Aa mutants by SFX*

439 The presence of crystals does not necessarily infer that molecules are well arranged  
440 within them. We therefore used SFX to assess the level of crystalline order in crystals of the  
441 mutants that displayed modified solubilization or shape. Data were collected at the SPB/SFX  
442 beam line of the EuXFEL (Hamburg, Germany) from crystals delivered across the X-ray beam  
443 using a liquid microjet focused through a gas-dynamic virtual nozzle GDVN<sup>23</sup> (Table 2). All  
444 crystals were kept in water at pH 7 for the GDVN injection, and pulses were delivered at the  
445 MHz repetition rate (1.1 MHz)<sup>89,89,90</sup> using 10 Hz trains of 160 pulses, with a spacing of 880 ns  
446 apart. Data was collected on the AGIPD detector at its maximum rate of 3.52 kHz<sup>36</sup>. With the  
447 notable exception of Y349F, crystals of all four single point mutants diffracted, yet unequal  
448 amounts of data were collected from each, and none from WT crystals, due to technical  
449 difficulties that arose during the experiment. This impeded a thorough comparison of the  
450 diffraction power of the various mutants, and prevented structure determination for the Y272F  
451 mutant. The structures of the other three mutants were determined, using the WT structure as  
452 a molecular replacement model for the phasing of diffraction data. We found that neither overall  
453 packing, tertiary structure nor interface formation is affected in the tested mutants at neutral  
454 pH (Supplementary Fig. 13). Of important note, these data demonstrate the feasibility of  
455 macromolecular nano-crystallography at MHz pulse rate using the brilliant micro-focused  
456 beam available at the SPB/SFX beamline of the EuXFEL.

457 The needle shape inclusions formed by C11AB were also investigated by SFX and  
458 found to present some crystalline order, as evidenced by diffraction rings up to ~6 Å resolution

459 in the powder diagram calculated from the maximum projection of 395656 hits (Supplementary  
460 Fig. 8d). It is clear, however, that a high-resolution structure is not readily practicable with these  
461 crystals, either because their small size makes them unsuitable for diffraction using a micro-  
462 focused XFEL beam or due to intrinsic disorder.

463

464

465 **Discussion (2219 words)**

466 We here report the previously-unknown structures of Cry11Aa and Cry11Ba, the two  
467 most potent Cry  $\delta$ -endotoxins expressed by mosquitocidal *Bti* and *Btj*, respectively. Both toxins  
468 occur as natural nanocrystals that are produced during the sporulation phase of the bacteria,  
469 and dissolve upon elevation of pH in the mosquito larvae gut. Proteolytic activation enables  
470 binding to their specific receptors<sup>37</sup>, including a membrane embedded alkaline phosphatase<sup>38</sup>  
471 but as well the co-delivered Cyt1Aa<sup>12,39–41</sup>, triggering insertion in gut cell membranes and  
472 subsequent oligomerization into pores that will eventually kill the cells. Both toxins are of  
473 industrial interests due to their environmental safety, explained by the multi-step activation  
474 outlined above, and to their high stability as crystals. Our results shed light on the mechanisms  
475 of *in vivo* crystallization, pH-induced dissolution and proteolytic activation, and on structural  
476 features that support the toxins specificity with respect to other Cry toxins. Thereby, our work  
477 offers a foundation for further improvement of the toxic activity or crystal size by rational design.  
478 Additionally, we demonstrate the feasibility of *de novo* structure determination of a previously-  
479 unknown protein-structure by SFX, from nanocrystals only 10,000 unit-cells across, using a  
480 single caged-terbium (TbXo4) derivative. Below, we recapitulate these findings and discuss  
481 their implications.

482

483 *In vivo crystallization pathway of Cry11 toxins*

484 The building block of Cry11Aa and Cry11Ba crystals is a tetramer formed by the interaction of  
485 two dimers, via their domain II. The dimers are themselves assembled from the interaction of  
486 two monomers, via their domains II and III. Crystals form from the honey-comb brick-wall piling  
487 of tetramers, as enabled by the face-to-back interaction of domain I from symmetry-related  
488 tetramers (Figure 2). Thus, all three domains are involved in the *in vivo* crystal packing of  
489 Cry11 toxins, each contributing a two-fold axis. This observation contrasts with other toxin  
490 structures determined from *in vivo* grown crystals, wherein either propeptide(s) (e.g.  
491 *Lysinibacillus sphaericus* BinAB<sup>28</sup> and *Bti* Cyt1A<sup>12</sup>) or a specific domain (e.g. domain I in *Btt*  
492 Cry3Aa from<sup>42,43</sup>) serves as the major contributor to crystallization. Expanding to previously  
493 determined Cry  $\delta$ -endotoxins<sup>12,28,42,44</sup> structures, solved from *in vitro* grown macrocrystals  
494 obtained following dissolution of the natural crystals at high pH, the same trend is observed –  
495 *i.e.*, crystallization mostly depends on a dedicated portion of the protein, either it be a N-  
496 terminal and/or C-terminal propeptide (e.g., the ~650 C-terminal residues in *Btk* Cry1Ac) or a  
497 specific domain (e.g. domain II in *Btk* Cry2Aa). Thus, the Cry11Aa and Cry11Ba structures  
498 illustrate a yet unobserved pathway for *in vivo* crystallization, wherein all domains act on a  
499 specific step of the coalescence process, *viz.* dimerization (domains II and III from two Cry11  
500 monomers), tetramerization (domains II from two Cry11 dimers) and tetramer-piling (domains  
501 I in each tetramer). With Cry11Aa featuring a larger dimerization interface, and Cry11Ba a

502 larger interface between piled tetramers, the two structures underline different levels of tradeoff  
503 between packing *into* tetramers and packing *of* the tetramers,  
504 The difference in thickness of Cry11Aa and Cry11Ba crystals is of interest. Considering that  
505 all crystals were produced in *Bti*, we could exclude the possibility that the slightly larger size of  
506 Cry11Ba crystals originates from a more efficient crystallization machinery in *Btj* than *Bti*.  
507 Puzzled by the presence of a 77-residue long low complexity region at the C-terminus of  
508 Cry11Ba (LCR-Cry11Ba), which is absent in Cry11Aa, we asked whether or not a C-terminal  
509 fusion of LCR-Cry11Ba with Cry11Aa would result in larger crystals. LCR regions have indeed  
510 been shown to support a variety of functions, including chaperoning<sup>35</sup> and reversible  
511 oligomerization<sup>45,46</sup> so that a role in crystal nucleation and/or growth could not be excluded.  
512 Support of the first, but not the second hypothesis was obtained. Indeed, the C11AB chimera,  
513 consisting of a fusion of LCR-Cry11Ba to the C-terminus of Cry11Aa, yields smaller crystals  
514 that poorly diffract, even when exposed to high intensity XFEL pulses. This observation is in  
515 line with previous results which showed that substitution of Cry11Ba domain III for that of  
516 Cry11Aa leads to limited expression and comparatively small inclusions<sup>47</sup>. Thus, the LCR  
517 region of Cry11Ba is unlikely to account for the difference in size between Cry11Aa and  
518 Cry11Ba crystals. Instead, we favor the hypothesis that it is the larger surface of interaction  
519 between piled tetramers that accounts for the larger size of the Cry11Ba crystals. Given the  
520 absence of electron density for LCR-Cry11Ba residues in the Cry11Ba structure, and the  
521 abundance of needle-like inclusions in the parasporal body enveloping the C11AB crystals, it  
522 is reasonable to assume that they do not engage in structurally important interactions with  
523 functional domains, but rather favor nucleation of crystals. This aid-to-nucleation would be  
524 required for Cry11Ba, which features a reduced dimerization interface, but not for Cry11Aa,  
525 wherein this interface is 53 % larger. In line with this hypothesis, four regions are predicted to  
526 form short adhesive motifs of the Low Complexity, Amyloid-like Reversible Kinked Segments  
527 (LARKS) type (Supplementary Fig. 3).

528

### 529 *Cry11 toxins depart from the canonical Cry $\delta$ -endotoxins architecture*

530 The structures of Cry11Aa and Cry11Ba shed light on features that would not have  
531 been predicted based on sequence alignments (*i.e.*, by homology modelling), and which  
532 largely deviate from the canonical organization observed in other Cry  $\delta$ -endotoxins<sup>12,28,42,44</sup>.  
533 The most notable difference is the presence of a ~36 to 38 residue insertion between strands  
534  $\beta_4$  and  $\beta_5$  in domain II, which results in an extra  $\beta$ -strand, coined  $\beta_{pin}$ . The  $\beta_{pin}$  not only  
535 participates in the formation of a modified  $\beta$ -prism, but contributes to a two-fold axis that  
536 supports tetramerization of Cry11 toxins through formation of two large  $\beta_h$ - $\beta_4$ - $\beta_3$ - $\beta_2$ - $\beta_{pin}$  -  $\beta_{pin}$ -  
537  $\beta_2$ - $\beta_3$ - $\beta_4$ - $\beta_h$  sheets between symmetry-related dimers into a tetramer. The observation of  
538 proteolytic cleavage sites at both the N- and C-termini of the  $\beta_{pin}$  suggests that it is removed



539 upon activation by mosquito gut proteases, in line with the observation of ~32 and ~36 kDa  
540 fragments upon proteolytic activation of the Cry11 toxins<sup>32</sup>. If true, the unique role of the  $\beta_{\text{pin}}$   
541 would be to support *in vivo* crystallization and its removal would entail the dissociation of  
542 tetramers into dimers and eventually monomers. While mutagenesis results indicate that this  
543 interface does not play a major role in crystal dissolution (see below), it seems likely that upon  
544 pH elevation and deprotonation of tyrosines and acidic groups, electrostatic repulsion will occur  
545 between Y349(OH) and E295(OE2) in Cry11Aa, and between Y350(OH) and P362(O) in  
546 Cry11Ba. Increased disorder of these regions could facilitate the access of proteases, and thus  
547 favor the activation of the Cry11Aa and Cry11Ba toxins. This hypothesis would rationalize the  
548 reluctance of the two toxins to recrystallize *in vitro* after pH induced dissolution, due to an  
549 impossibility to re-form tetramers – or at least, to re-match the exact positioning of the  $\beta$ -pin.  
550 The Cry11 toxins also differ from other Cry  $\delta$ -endotoxins by the presence of a conserved N/D-  
551 DDLGITT insertion between  $\beta$ 21 and  $\beta$ 22, contributing a short helix, and by deletions of ~5-10  
552 residues in the  $\alpha$ 3- $\alpha$ 4 and  $\beta$ 20- $\beta$ 21 loops, respectively. Compilation of these changes likely  
553 explains failures to phase the Cry11 structures by the molecular replacement method, even  
554 when *Btk* Cry2Aa, which also features a  $\alpha_h\beta_h$ -handle, was used as a starting model.

555

#### 556 *Mapping the interfaces involved in crystal dissolution.*

557 Our efforts to determine the structures of Cry11Aa and Cry11Ba at alkaline pH were  
558 unsuccessful, due to high sensitivity of crystals diffraction quality to pH increase. In the case  
559 of Cry11Aa we could not collect data, while in the case of Cry11Ba, we obtained a low-  
560 resolution structure which, while showing possible inter-domain rearrangements, did not inform  
561 on specific side chain rearrangements. Therefore, we resorted to site-specific mutagenesis to  
562 obtain information regarding the crystal dissolution pathway. We found that the crystal interface  
563 most sensitive to pH elevation is the one enabling the honey-comb piling of Cry11 tetramers,  
564 with the Cry11Aa-F17Y mutant displaying increased pH sensitivity (with an  $SP_{50}$  of  $10.6 \pm 1.0$   
565 compared to  $11.2 \pm 1.0$  for WT Cry11Aa crystals). In contrast, the dimerization (Y349F mutant)  
566 and tetramerization interfaces (Y449F mutant) appear to be less pH-sensitive. At the monomer  
567 level, we found that the three-domain interface to which  $\alpha_8$  and the  $\alpha_h\beta_h$ -handle contribute is  
568 not very sensitive to pH increase (Y272Q and D507N+D514N mutants), possibly due to  
569 burying of mutated residues at the interface, preventing bulk solvent to access these sites.  
570 Alternatively, interaction of Cry11 toxins with its membrane-bound receptors<sup>37</sup> could be a  
571 required step to expose  $\alpha_8$ , shown to play a major role in binding and toxicity<sup>48</sup>.

572 The intramolecular domain I vs. domain III interface was found to be important for the  
573 pH-induced crystal dissolution, with the Cry11A E583Q mutant displaying a reduced sensitivity  
574 to pH ( $SP_{50}$  of  $12.6 \pm 1.0$ ). Yet unlike the other tested interfaces, which are overall well  
575 conserved, the domain I vs. domain III interface differs in Cry11Aa and Cry11Ba, suggesting

576 that caution is advised upon reflecting results obtained from Cry11Aa mutants onto Cry11Ba.  
577 Indeed, E583 is substituted for glycine in Cry11Ba (G587), suggesting a different mechanism  
578 of pH-induced separation of domain I and domain III – or at least, the participation of other  
579 residues. Structural analysis suggests that the substitution of Cry11Ba Q247 for a glutamic  
580 acid could compensate for the absence of E583, enabling electrostatic repulsion of V494 ( $\beta$ 14)  
581 – found at the opposed end of this interface – upon pH elevation. Numerous other residues at  
582 this interface, otherwise mostly conserved between Cry11Aa and Cry11Ba, remain as  
583 candidates to further tune the pH sensitivity. For example, Y241(OH) is H-bonded to  
584 D586(OD1; 2.6 Å) and D590(OD2; 2.8 Å) in Cry11Aa and Cry11Ba, respectively, suggesting  
585 that mutation of this residue into a phenylalanine (Y241F) and/or of D586/D590 into  
586 asparagines would reduce the pH sensitivity while not affecting stability. Likewise, E234 H-  
587 bonds to Q625(NE2; 2.6 Å) in Cry11Aa, and to K629(NZ; 2.8 Å) and R553(NH1; 2.9 Å) in  
588 Cry11Ba, suggesting that a E234Q mutation would reduce pH sensitivity in the two toxins  
589 whilst not affecting their folding. Inversely, the mutation into a glutamic acid of Q511/Q515,  
590 squeezed between a tryptophan (W584/W588), an arginine (R549/R553) and a glutamic acid  
591 (E234), would be expected to increase the pH sensitivity of the domain I vs. domain III  
592 intramolecular interface in both Cry11Aa/Cry11Ba – and by extension, that of their crystals.

593

#### 594 *Implication for the future of nanocrystallography using SFX.*

595 In this study, *de novo* phasing was required – not because of the absence of  
596 homologous structures, but because none of those available were sufficiently close to serve  
597 as a search model for molecular replacement. Using Tb-Xo4, a caged terbium compound, we  
598 could phase the *Bti* Cry11Aa structure by SAD, from ~77,000 diffraction patterns collected on  
599 crystals only 10,000 unit cell across – an achievement to compare to the determination of the  
600 structure Ls BinAB from > 370,000 patterns (native and three derivatives) collected on crystals  
601 100,000 unit cell across<sup>49</sup>. Our success in phasing the Cry11Aa structure stemmed from a  
602 combination of advances in SFX data processing tools over the last five years and the use of  
603 a dramatically powerful phasing agent, and should offer hope to investigators seeking to  
604 determine the structure of proteins of which no known structural homologue exists and that  
605 have to resort to SFX due to smallness of their crystals. It is foreseeable, however, that *de-*  
606 *novo* structure determination will be helped by recent advances in comparative and *ab-initio*  
607 modelling and the availability of programs such as RosettaFold<sup>50</sup> and AlphaFold2<sup>51</sup>, capable  
608 of producing a decently-accurate structure for virtually all proteins and thus a good model for  
609 phasing of crystallographic data by molecular replacement. Latest releases of the two  
610 programs were published in the final stage of the writing of this manuscript, hence we asked  
611 whether or not the availability of these tools would have facilitated our journey towards the  
612 Cry11 toxins structures, and submitted the sequence of Cry11Aa to the two servers. For

613 RosettaFold, the rmsd to the final refined structure of the five best models was over 4 Å, with  
614 discrepancies observed mostly in domain II. For AlphaFold2, however, the two first models  
615 displayed rmsd of 1.2 and 1.0 Å to the final structure, respectively. Using the worst of these  
616 two models, we could find a molecular replacement solution using Phaser, and a partial model  
617 featuring 95% of the residues in sequence was obtained after 20 cycles of automatic iterative  
618 model-building and refinement using Buccaneer<sup>52</sup> and Refmac<sup>53</sup>. Thus, a problem which  
619 occupied a handful of crystallographers for several years could have been solved in less than  
620 an hour using the new tools recently made available to the structural biology community. Based  
621 on our results, it is tantalizing to claim that the phase problem in crystallography has been  
622 solved, or that experimental structural biology has lived, but such assertions would likely be  
623 shortsighted. Rather, we encourage investigators to challenge AlphaFold2 and RosettaFold  
624 as much as humanly feasible, but to not forsake *de novo* phasing as it may remain the only  
625 route to success in difficult cases where molecular replacement based on such models does  
626 not work<sup>54</sup>. It must also be emphasized that in the case of Cry11 toxins and, more generally,  
627 naturally-crystalline proteins, the issue is not just phasing, but packing. For such proteins,  
628 crystal formation and dissolution serve function, hence characterization of packing interfaces  
629 is central to finely comprehend their bioactivation cascades. Without the naturally-occurring  
630 crystals and the atomic resolution SFX structures, it would not have been possible to make  
631 predictions on potential mutations affecting Cry11Aa crystal formation or dissolution.

632

633

634

635 **Materials and Methods (4643 words)**

636 **Crystal production and purification.** Crystals of Cry11Aa and Cry11Ba were produced by  
637 electrotransformation of the plasmids pWF53 and pPFT11S<sup>55</sup> into the acrySTALLIFEROUS strain  
638 4Q7 of *Bacillus thuringiensis* subsp. *israelensis* (Bti; The Bacillus Genetic Stock Center  
639 (BGSC), Columbus OH, USA), respectively<sup>56</sup>. Colonies were selected on LB agar medium  
640 supplemented with erythromycin (25 µg/mL) and used to inoculate precultures of LB liquid  
641 medium. For Cry11Aa production, precultures were spread on T3 sporulation medium. After  
642 incubation at 30°C for 4 days, spores/crystals suspensions were collected using cell scrapers  
643 and resuspended in ultrapure water. After sonication-induced cell lysis and subsequent  
644 centrifugation at 4000 g for 45 min to discard cell and medium debris, pellets were  
645 resuspended in water and crystals were purified using a discontinuous sucrose gradient (67-  
646 72-79 %). After ultracentrifugation, crystals were recovered and several rounds of  
647 centrifugation/resuspension in ultrapure water allowed discarding as much sucrose as possible  
648 for proper downstream application. Crystal purity was verified by SDS-PAGE on 12% gels.  
649 Purified crystals were conserved in ultrapure water at 4 °C until use. For Cry11Ba, a glycerol  
650 stock of the 4Q7/pPFT11S was streaked onto 25 µg/mL erythromycin Nutrient Agar plates.  
651 From here a single colony was selected and added to a Glucose-Yeast-Salts (GYS) media  
652 culture and allowed to grow continuously at 30°C, 250 rpm for 5 days. This culture was then  
653 spun down, resuspended in ultrapure water, and the lysate was sonicated for 3 min at 50%  
654 duty. The sonicated lysate was added to the 30-65% discontinuous sucrose gradient (35-40-  
655 45-50-55-60-65 %) and spun down for 70 min at 20,000 rpm and 4°C. The sucrose gradient  
656 was then hand fractionated with Cry11Ba crystals collected around 57-60% and dialysed into  
657 ultrapure water. Crystal characterization and purity was completed by phase contrast light  
658 microscopy, X-ray powder diffraction, transmission electron microscopy, and 4-12% SDS-  
659 PAGE gels. The pure Cry11Ba crystals were stored at 4°C in ultrapure water.

660  
661 **Cry11Aa mutagenesis.** Based on the SFX structure of Cry11Aa, a total of 7 mutants of  
662 Cry11Aa were constructed to challenge the different crystal packing and intramolecular  
663 interfaces. The rationale behind these mutations is illustrated in Supplementary Fig. 9 and  
664 discussed in the main text. Point-mutations were inserted into *cry11aa* gene by Gibson  
665 assembly using pWF53 as a backbone<sup>56</sup>. Two different primer couples were used for each  
666 mutation to amplify two fragments that were complementary by their 15-18 bp overlapping 5'  
667 and 3' overhangs with a target T<sub>m</sub> of 50°C. Point mutations were inserted in the  
668 complementary part of the overhangs of the two fragments spanning the *cyt1aa* region to be  
669 mutated. The double mutant D507N-D514N was successfully constructed in a single-step by  
670 respectively adding the D507N mutation on the non-overlapping overhang region of the  
671 forward primer, and the D514N on the non-overlapping overhang of the reverse one. The triple

672 mutant Y272Q-D507N-D514N was constructed by using the primers containing the Y272Q  
673 mutation and the plasmid pWF53-D507N-D514N as a backbone. In addition to the point  
674 mutants, a Cry11Aa-Cry11Ba chimeric toxin – coined C11AB – was also constructed. For this,  
675 the sequence of the *cry11aa* gene was fused with the 234 bp extra 3' extension of *cry11ba*  
676 gene, which is suggested to feature a low complexity region (LCR) based on sequence  
677 analysis using the LCR-eXXXplorer web platform  
678 (<http://repeat.biol.ucy.ac.cy/fgb2/gbrowse/swissprot>)<sup>57</sup>, which implements the CAST<sup>19</sup> and  
679 SEG<sup>20</sup> computational methods to identify LCR. The C11AB chimera was constructed by  
680 Gibson assembly following a “1 vector, 2 fragments” approach. The plasmid pWF53 containing  
681 the *cry11aa* gene was used as a backbone and the *cry11ba* 3' fragment was amplified from  
682 the extracted and purified plasmid of the WT strain of *Btj* containing the *cry11ba* gene. The list  
683 of primers used for plasmids construction is available in Supplementary Table 2. For each  
684 plasmid construction, the fragments with overlapping overhangs were assembled using the  
685 NEBuilder HiFi DNA Assembly (New England BioLabs) as previously described<sup>12</sup>. Briefly, after  
686 90 min incubation at 50°C, the constructed plasmids were transformed by heat shock into  
687 chemically competent Top10 *Escherichia coli* (New England BioLabs). Plasmids were  
688 extracted from colonies selected on LB agar medium containing ampicillin (100 µg mL<sup>-1</sup>) using  
689 the NucleoSpin Plasmid extraction kit (Macherey-Nagel) following the manufacturer's  
690 instructions. The successful construction of each plasmid was assessed by double digestion  
691 (EcoRI and BamHI) followed by migration on 1% agarose gel stained with SYBR Safe  
692 (Invitrogen) and by Sanger sequencing of the region containing the mutation at the Eurofins  
693 Genomics sequencing platform. Of note, the *cry11aa* gene was also fully sequenced to  
694 validate its sequence for mutagenesis primer design and for comparing the expected toxin size  
695 to the observed one in mass spectrometry analyses. All mutants were produced as crystals in  
696 *Bt*, as described above. The presence of the mutated *cry11aa* gene sequence in the  
697 transformed *Bt* colony used for production was verified by colony PCR using specific primers  
698 and Sanger sequencing at the Eurofins Genomics sequencing platform. Crystals from all  
699 mutants were analyzed by SDS-PAGE on 12% gels. For C11AB, its proper size was confirmed  
700 by using the “gel analysis” module implemented in the software ImageJ v1.51k ( $N = 7$ )<sup>58</sup>.

701 **Crystal visualization by scanning electron microscopy (SEM).** Purified crystals of Cry11Aa  
702 WT and of the 7 mutants were visualized using either a Zeiss LEO 1530 scanning electron  
703 microscope from the SEM facility of the European Synchrotron Radiation Facility (ESRF,  
704 Grenoble, France), a Thermo Fisher Quanta 650 FEG environmental SEM (ESEM) available  
705 for users at the European XFEL (EuXFEL, Hamburg, Germany) or a JEOL JSM-6700M FE-  
706 SEM (UCLA, Los Angeles, USA). For SEM at ESRF, samples were coated with a 2 nm thick  
707 gold layer with the Leica EM ACE600 sputter coater before imaging. For ESEM at the

708 European XFEL, samples were diluted (1/1000) and mixed with 25 mM of ammonium acetate.  
709 Samples were then coated with a thin gold layer as described above using a Leica EM ACE600  
710 sputter coater as well. Images were recorded at 15 kV acceleration voltage by collecting  
711 secondary electrons using an Everhart-Thornley-Detector (ETD detector) in high-vacuum  
712 mode. For SEM at UCLA, samples were diluted (1/5) and ultrapure H<sub>2</sub>O. they were then added  
713 to 300 mesh Cu F/C grids that were positively glow discharged. These samples were then  
714 wicked away and washed with ultrapure water, wicked, and allowed to dry overnight to ensure  
715 all moisture had evaporated inside of a dessicator. These were then attached to a holder with  
716 carbon tape and coated with an Anatech Hummer VI sputter coater with approximately 2 nm  
717 of thick gold layer. Images were recorded at 5 kV acceleration voltage by collecting secondary  
718 electrons using a Lower secondary electron (LEI) or Upper secondary electron in-lens (SEI)  
719 detector.

720 **Crystal visualization by transmission electron microscopy (TEM).** Non-purified crystals of  
721 Cry11Aa WT were visualized using a Thermofisher TF20 electron microscope from the IBS  
722 electron microscopy platform. For negative staining TEM, samples were diluted 5 times in H<sub>2</sub>O  
723 and 4  $\mu$ l of the diluted sample was introduced to the interface of an amorphous carbon film  
724 evaporated on a mica sheet. The carbon film was then floated off the mica sheet in  $\sim$ 200  $\mu$ l  
725 2% sodium silicotungstate (SST) solution. The carbon film with the crystal sample was then  
726 recovered onto a Cu 300 mesh TEM grid after 30 s, let dry, and imaged at 200 keV. Images  
727 were recorded on a Gatan OneView CMOS detector. Non-purified crystals of Cry11Ba WT  
728 were visualized using an FEI Tecnai T12 electron microscope within the UCLA California  
729 Nanoscience Institute, EICN facility. For negative staining TEM, samples were prepared by  
730 adding 5  $\mu$ L of pure crystal fractions in 10  $\mu$ L ultrapure H<sub>2</sub>O. 2.5  $\mu$ L of this sample was added  
731 to 300 mesh Cu F/C grids that were positively glow discharged. These samples were then  
732 wicked away using Whatman 1 filter paper; washed with 2.5  $\mu$ L ultrapure H<sub>2</sub>O, wicked; and  
733 negatively stained with 2.5  $\mu$ L 2% uranyl acetate, wicked. These were allowed to dry overnight  
734 to ensure all moisture had evaporated and imaged at 120 keV. Images were recorded on a  
735 Gatan 2kX2k CCD.

736 **Crystal characterization by atomic force microscopy (AFM).** Crystals of Cry11Aa were  
737 visualized by AFM as previously described<sup>12</sup>. Briefly, 5  $\mu$ L of crystals suspended in ultrapure  
738 water were deposited on freshly cleaved mica. After 30 min in a desiccation cabinet (Superdry  
739 cabinet, 4% relative humidity), crystals were imaged on a Multimode 8, Nanoscope V (Bruker)  
740 controlled by the NanoScope software (Bruker, Santa Barbara, CA). Imaging was done in the  
741 tapping mode (TAP) with a target amplitude of 500 mV (about 12 nm oscillation) and a variable  
742 setpoint around 70% amplitude attenuation. TESPA-V2 cantilevers ( $k = 42 \text{ Nm}^{-1}$ ,  $F_q = 320$

743 kHz, nominal tip radius = 7 nm, Bruker probes, Camarillo, CA, USA) were used and images  
744 were collected at ~1 Hz rate, with 512- or 1024-pixel sampling. Images were processed with  
745 Gwyddion<sup>59</sup>, and if needed stripe noise was removed using DeStripe<sup>60</sup>. Measurements were  
746 performed on Cry11Aa WT and on mutants selected on the basis of their aspect in eSEM  
747 images (Y449F) or their solubilization pattern (F17Y and E583Q). Size measurements were  
748 performed on AFM images using Gwyddion<sup>59</sup> in a semi-automated protocol. A classical height  
749 threshold was applied to each image to select as many individual crystals as possible.  
750 Sometimes, partially overlapping crystals were individualized using the manual edition of the  
751 mask of selected crystals by adding a separation line. Finally, a filter was applied to remove  
752 very small selections (artefacts) or crystals touching the edge of the image. Measures were  
753 obtained using the ‘distribution of grains’ feature in Gwyddion where the crystal thickness (T)  
754 is the returned mean value, the volume (V) is the Laplacian background basis volume, and the  
755 length (L) and width (W) are the major and minor semi-axes of equivalent ellipses, respectively.  
756 The total number of crystals measured are: 45 for WT, 93 for F17Y, 60 for Y449F, and 94 for  
757 E583Q.

758  
759 **Data collection history.** The Cry11Aa/Cry11Ba structure determination project was initiated  
760 in 2015. Data were collected at five different occasions, in two XFEL facilities, namely at the  
761 Linac Coherent Light Source (LCLS), Stanford (USA) and EuXFEL, Hamburg (Germany).  
762 During our first LCLS-SC3 beamtime (cxi04616), we collected data from native Cry11Ba (2.3  
763 Å resolution), and in our second (LO91), we collected data from native Cry11Aa (2.8 Å  
764 resolution). Nanocrystals grown by recombinant expression in the modified acrySTALLIFEROUS  
765 4Q7 strain of *Bti* were injected by a microfluidic electrokinetic sample holder (MESH) device<sup>61</sup>  
766 in the microfocus chamber of LCLS-SC3<sup>62</sup>. After data reduction using cctbx.xfel and dials (hit-  
767 finding through merging)<sup>63–66</sup>, we attempted phasing of both datasets by molecular  
768 replacement (MR), using sequence-alignment based multi-model approaches implemented in  
769 Mr Bump (based on MR by Molrep<sup>67</sup>) as well as custom-scripts testing models produced by  
770 Rosetta<sup>68</sup> (using the Robetta server; <http://rosetta.bakerlab.org/>) and SwissProt<sup>25</sup>  
771 (<https://www.ebi.ac.uk/uniprot/>) servers (based on MR by Phaser<sup>69</sup>). Failure to find a homolog  
772 of a sufficiently-close structure led us to attempt de novo phasing of the Cry11 nanocrystalline  
773 proteins. Initially, we aimed at obtaining experimental phases for Cry11Ba, considering that its  
774 larger crystals would produce a stronger diffraction signal which in turn would facilitate phasing.  
775 Hence, we collected derivative data on Cry11Ba, from crystals soaked with Gd, Pt and Au salts  
776 (P127 experiment) before injection using a MESH device<sup>61</sup>. Unfortunately, the data did not  
777 allow phase determination, as indicated by very weak and absent peaks in the isomorphous  
778 and anomalous difference maps, respectively (Supplementary Fig. 2), due to low occupancy  
779 of the soaked metal ions. Hence, we shifted focus to Cry11Aa crystals soaked with a recently

780 introduced caged-terbium compound, Tb-Xo4<sup>16</sup> (P125 experiment). Crystals were injected  
781 using a GDVN<sup>23</sup> liquid microjet in the microfocus chamber of LCLS-SC3<sup>62</sup>. Online data  
782 processing was performed using NanoPeakCell<sup>70</sup> and CASS<sup>71</sup>. Offline data processing with  
783 NanoPeakCell<sup>70</sup> (hit finding) and CrystFEL<sup>72</sup> (indexing and merging) revealed a strong  
784 anomalous signal that enabled determination of the substructure and phasing of the SFX data,  
785 using Crank2<sup>73</sup> and its dependencies in the CCP4 suite<sup>74</sup> (see below for more details). The  
786 Cry11Aa structure was thereafter used to phase the Cry11Ba datasets by molecular  
787 replacement, revealing *a posteriori* that the Gd, Pt and Au ions had successfully bound to the  
788 crystalline Cry11Ba in the various derivatives collected during P127, despite anomalous and  
789 isomorphous signals being too weak to enable phasing. We last attempted data collection on  
790 Cry11Aa and Cry11Ba crystals soaked at elevated pH and injected by a MESH device (P141  
791 experiment). Only Cry11Ba crystals could sustain the pH jump and yielded usable data. From  
792 the comparative analysis of the Cry11Aa and Cry11Ba structures, we nonetheless designed  
793 mutations aimed at increasing or decreasing the resilience of crystals; these were introduced  
794 in the Cry11Aa gene, and crystals were produced by recombinant expression in *Bti*. From  
795 these, SFX data were collected at the MHz pulse rate, during experiment P2545 at the  
796 SPB/SFX beam line of EuXFEL where a GDVN was used to inject crystals. The data were also  
797 processed with NanoPeakCell<sup>70</sup> (hit finding) and CrystFEL<sup>72</sup> (indexing and merging).

798  
799 **Data collection and processing, and structure refinement.** During the P125 beamtime at  
800 LCLS, where the SAD data used for the phasing of the Cry11Aa structure were collected, the  
801 X-ray beam was tuned to an energy of 9800 eV (i.e. a wavelength of 1.27 Å), a pulse duration  
802 of 50 fs, a repetition rate of 120 Hz, and a focal size of 5 µm. SAD data were collected from  
803 nanocrystals soaked for 30 hours with Tb-Xo4 at 10 mM in water, prior to GDVN injection<sup>23</sup>.  
804 Of 558747 images collected using the 5 µm beam available at the at LCLS-SCC, a total of  
805 77,373 images were indexed of which 76,687, 292, 217 and 177 using Xgandalf<sup>75</sup>, Dirax<sup>76</sup>,  
806 taketwo<sup>77</sup> and Mosflm<sup>78</sup>, respectively, in CrystFEL v.0.8.0<sup>79</sup>. Post-refinement was not  
807 attempted, but images were scaled one to another using the ‘unity’ model in CrystFEL  
808 *partialator*, yielding a derivative dataset extending to 2.55 Å resolution. *A posteriori*, we found  
809 that simple Monte Carlo averaging using the ‘second-pass’ option in CrystFEL *process\_hkl*  
810 would have yielded data of similar quality. A native dataset was also collected and processed  
811 in the same fashion yielding, from 792623 collected patterns of which 48,652 were indexed, a  
812 dataset extending to 2.60 Å resolution. The substructure of the derivative dataset was easily  
813 determined by ShelxD (figure of merit (FOM): 0.22), prompting us to try automatic methods for  
814 structure determination. Using Crank2<sup>73</sup> and its dependencies (ShelxC, ShelxD, Solomon,  
815 Bucanneer, Refmac5, Parrot) in CCP4 Online<sup>80</sup>, the FOM was 0.52 after density modification,  
816 and rose to 0.88 upon building of 613 residues. This first model was characterized by  $R_{\text{work}}/R_{\text{free}}$



817 of 27.7/32.1 % and was further improved by automatic and manual model building in  
818 phenix.autobuild<sup>81</sup> and Coot<sup>82</sup> until 630 residues were correctly build. This model was then  
819 used to phase the native data. Final manual rebuilding (using Coot<sup>82</sup>) and refinement (using  
820 phenix.refine<sup>83</sup> and Refmac5<sup>53</sup>) afforded a native model characterized by  $R_{\text{work}}/R_{\text{free}}$  of  
821 17.2/24.1 % and consisting of most of the 643 residues. Only the first 12 N-terminal residues  
822 are missing (Table 1).

823  
824 Cry11Ba data were collected during the cxi04616 and P141 beamtimes at LCLS-CXI. At both  
825 occasions, the photon energy was 9503 eV (i.e., a wavelength of 1.30 Å), a pulse duration of  
826 50 fs, a repetition rate of 120 Hz, and a focal size of 1 μm – i.e., a similar standard configuration  
827 (pulse length, repetition rate) than that used for Cry11Aa, notwithstanding the beam size and  
828 wavelength. Data were collected from crystals at pH 6.5 (30% glycerol in pure water; cxi04616)  
829 and pH 10.4 (30% glycerol in 100 mM CAPS buffer; P141), presented to the X-ray beam using  
830 a MESH injector<sup>22</sup>. Of 813133 images collected for the pH 6.5 dataset, 16415 were indexed,  
831 of which 15344 were scaled, post-refined, and merged using cctbx.xfel<sup>63–66</sup> and PRIME<sup>84</sup>,  
832 yielding a dataset extending to 2.3 Å resolution. The Cry11Aa structure was used as a starting  
833 model to phase the Cry11Ba pH 6.5 dataset by molecular replacement using Phaser<sup>69</sup> with  
834 initial  $R_{\text{work}}/R_{\text{free}}$  being 34.4/40.4 %. Manual model building (using Coot<sup>82</sup>) and refinement  
835 (using Refmac<sup>53</sup> and Buster<sup>85</sup>) afforded a model characterized by  $R_{\text{work}}/R_{\text{free}}$  of 20.5/24.0 %  
836 (Table 1). Because the 3 Å resolution Cry11Ba pH 10.4 data was of limited utility, in view of  
837 absence of major peaks in the Fourier difference map calculated with the pH 6.5 data as a  
838 reference, and of a 1% change in the unit cell volume ascribable to the use of a different  
839 glycerol concentrations during injection of the two samples, it was not included in our PDB and  
840 CXIDB depositions.

841 Diffraction data on the Cry11Aa mutants at pH 7.0 was acquired on the SPB/SFX beamline at  
842 EuxFEL during our P002545 beamtime allocation, using a GVDN injector and X-ray energy  
843 and focal size of 9300 eV (1.33 Å) and 1.3 μm (FWHM), respectively. Technical problems  
844 allowed us to collect only a limited number of diffraction pattern of the Cry11Aa-Y349F mutant.  
845 3,150,500; 5,993,679 and 3,523,741 images were collected for the F17Y, Y449F and E583Q  
846 mutant, respectively, of which 28,227; 104,359 and 21,833 could be processed using  
847 CrysFEL0.8.0<sup>79</sup> and MonteCarlo based scaling and merging. The three structures were solved  
848 using MR with Phaser<sup>69</sup>, using the Cry11Aa WT structure as input model. The structures were  
849 refined using Phenix.refine<sup>83</sup> and Coot<sup>82</sup>, with final  $R_{\text{work}}/R_{\text{free}}$  values of 21.2/25.1 % for  
850 Cry11Aa-F17Y, 22.4/25.1 % for Cry11Aa-Y449F and 21.5/25.4 % for Cry11Aa-E583Q (Table  
851 2).

852

853 **Structure analysis.** Figures were prepared using pymol v. 2.5<sup>86</sup> (Fig. 1, 2 and Supplementary  
854 Fig. 4, 9, 13) and aline (Supplementary Fig. 3)<sup>87</sup>. Radii of gyration were predicted using the  
855 pymol script rgyrate ([https://pymolwiki.org/index.php/Radius\\_of\\_gyration](https://pymolwiki.org/index.php/Radius_of_gyration)). Interfaces were  
856 analyzed with PISA<sup>88</sup> and rmsd among structures were calculated using pymol using the  
857 'super' algorithm. Sequence based alignment – performed using EBI laglign and ClustalW<sup>89</sup> –  
858 was challenged by the large gaps between Bti Cry11Aa, Btj Cry11Ba, Btk Cry2AA and Btt  
859 Cry3Aa, while structure-based alignment – performed using SSM<sup>90</sup> – was blurred by the  
860 varying size of secondary structure elements in the three domains of the various toxins. Hence,  
861 for Supplementary Fig. 1, 3, the alignment of Bti Cry11Aa, Cry11Ba, Cry2AA and Cry3Aa was  
862 performed using strap<sup>91</sup> which takes into account both sequence and structural information.  
863 Specifically, the online version of the program was used (<http://www.bioinformatics.org/strap/>)  
864 <sup>92</sup>.

865  
866 **Structure prediction using AlphaFold2 and RosettaFold:** RosettaFold<sup>50</sup> predictions were  
867 obtained by submitting the sequence to the Rosetta structure-prediction server  
868 (<https://rosetta.bakerlab.org>). AlphaFold2<sup>51</sup> predictions were obtained by use of the  
869 Colaboratory service from Google Research  
870 ([https://colab.research.google.com/github/sokrypton/ColabFold/blob/main/beta/AlphaFold2\\_a  
871 dvanced.ipynb](https://colab.research.google.com/github/sokrypton/ColabFold/blob/main/beta/AlphaFold2_advanced.ipynb)). The mmseq2 method<sup>93,94</sup> was employed for the multiple-sequence  
872 alignment instead of the slower jackhmmer method<sup>95,96</sup> used in<sup>51</sup>. Structural alignments were  
873 performed using the *align* tool in PyMOL<sup>86</sup>. Molecular replacements trials were carried out with  
874 Phaser<sup>69</sup>. Using the best five RosettaFold models, all characterized by an overall rmsd to the  
875 final structure superior to 4 Å, no molecular replacement solution could be found, due to  
876 inaccurate prediction of domain II  $\beta_{pin}$  and  $\alpha_h$ - $\beta_h$  regions, resulting in clashes. The best  
877 alphafold2 model was yet successful at predicting the domain II structure, which enabled  
878 successful phasing by molecular replacement, yielding a model characterized by  $R_{free}$  and  $R_{work}$   
879 values of 0.322 and 0.292, respectively. This model was further use as a starting model for  
880 automatic model building and refinement using the buccaneer pipeline in CCP4, resulting in a  
881 model characterized by  $R_{free}$  and  $R_{work}$  values of 0.245 and 0.215, respectively, after only five  
882 automatic cycles of iterative model-building, refinement and density modification using  
883 buccaneer<sup>52</sup> and refmac5<sup>53</sup> in the CCP4 suite<sup>74</sup>.

884  
885 **Crystal solubilization assays.** The solubility of crystals of Cry11Aa WT and of the mutants  
886 F17Y, Y272Q, Y349F, Y449F, D507N-D514N and E583Q was measured at different pH values  
887 as previously described<sup>12</sup>. Briefly, crystal suspensions were centrifuged at 11,000 g for 2 min  
888 and resuspended in 18 different buffers with pH ranging from 8.6 to 14.2. After 1h incubation  
889 in each buffer, crystals were centrifuged and the supernatant was collected. The concentration

890 of soluble toxin in the supernatant was quantified using a Nanodrop 2000 (Thermo Fisher  
891 Scientist) by measuring the OD at 280 nm and by using the molar extinction coefficient and  
892 toxin size (102,930 M<sup>-1</sup> cm<sup>-1</sup> and 72.349 kDa, respectively, as calculated with the ProtParam  
893 tool of ExPASy (<https://www.expasy.org>) using the Cry11Aa protein sequence available under  
894 accession number “P21256 [<https://www.uniprot.org/uniprot/P21256>]”). Solubility was  
895 measured in triplicate for each toxin (Cry11Aa WT and mutants) and each pH. Data are  
896 normalized and represented as percentage of solubilization by dividing the concentration  
897 measured at a given pH by the concentration at the highest pH measured. Solubility of  
898 Cry11Aa WT and its different mutants was compared by calculating SP<sub>50</sub> (pH leading to  
899 solubilization of 50% of crystals) as previously described <sup>12</sup>, by fitting the data using a logistic  
900 regression model for binomial distribution using a script modified from <sup>97</sup>. Differences in SP<sub>50</sub>  
901 between mutants were considered significant when 95% confidence intervals (CI), calculated  
902 using a Pearson’s chi square goodness-of-fit test, did not overlap <sup>98</sup>. All statistics were  
903 conducted using the software R 3.5.2 <sup>99</sup>.

904 For the Cry11Ba, the crystal suspensions were centrifuged at 13,300 g for 3 min and ultrapure  
905 H<sub>2</sub>O was removed from crystals. They were then resuspended in one of 18 buffers ranging  
906 from pH 7 to 14. These crystals were incubated for 1 hr, afterwards the solution was  
907 centrifuged at 13,300 g and the supernatant was separated from the crystal pellet. The  
908 concentration of the supernatant was then quantified by a ThermoFisher Nanodrop One  
909 (Thermo) by measuring the OD for 280 nm and utilizing the molar extinction coefficient and  
910 toxin size (114600 M<sup>-1</sup>.cm<sup>-1</sup> and 81344.18 Da respectively) that were calculated with ExPASy  
911 ProtParam using the Cry11Ba sequence available at Uniprot.org under accession number  
912 Q45730. Solubility was measured in triplicate for the toxin at each pH measured. This was  
913 then further tested by conducting a turbidity assay by resuspending the crystal pellet in 150 µL  
914 ultrapure H<sub>2</sub>O and placed in a 96-well plate to be read on an NEPHELOstar Plus (BMG  
915 Labtech) nephelometer. These counts were normalized by subtracting the background signal  
916 and conducted in triplicate.

917

### 918 **Proteomic characterization**

919 For SDS-PAGE experiments, samples heated to 95 °C were migrated on 12 % SDS-PAGE  
920 gels (1 h, 140 V) after addition of Laemmle buffer devoid of DTT. After staining by overnight  
921 incubation in InstantBlue (Sigma Aldrich, France), gels were washed twice in ultrapure water  
922 and migration results were digitalized using a ChemiDoc XRS+ imaging system controlled by  
923 Image Lab software version 6.0.0 (BioRad, France).

924

### 925 **MALDI TOF mass spectrometry**

926 MALDI TOF mass spectra on Cry11Aa were acquired on an Autoflex mass spectrometer  
927 (Bruker Daltonics, Bremen, Germany) operated in linear positive ion mode. External mass  
928 calibration of the instrument, for the  $m/z$  range of interest, was carried out using as calibrants  
929 the monomeric (66.4 kDa) and dimeric (132.8 kDa) ions of BSA (reference 7030, Sigma  
930 Aldrich). Just before analysis, crystals of Cry11Aa were firstly dissolved in acetonitrile/water  
931 mixture (70:30,  $v/v$ ). For samples under reducing condition, DTT was added at a final  
932 concentration of 10 mM. The obtained solutions were therefore directly mixed in variable ratios  
933 (1:5, 1:10, 1:20,  $v/v$ ) with sinapinic acid matrix (20 mg/mL solution in  
934 water/acetonitrile/trifluoroacetic acid, 70:30:0.1,  $v/v/v$ , Sigma Aldrich) to obtain the best signal-  
935 to-noise ratio for MALDI mass spectra. 1 to 2  $\mu$ L of these mixtures were then deposited on the  
936 target and allowed to air dry (at room temperature and pressure). Mass spectra were acquired  
937 in the 10 to 160 kDa  $m/z$  range and data processed with Flexanalysis software (v.3.0, Bruker  
938 Daltonics).

939 MALDI TOF mass spectra on Cry11Ba were collected at the USC Mass Spectrometry Core  
940 Facility, Los Angeles, CA, USA. Purified Cry11Ba protein was dissolved in water (~ 5 mg/mL)  
941 and heated at 70 °C for 10 min to facilitate dissolution. One microliter of protein solution was  
942 spotted on a 384 Big Anchor MALDI target and let dry at room temperature. Crystallized protein  
943 was washed on-target twice with MQ water, on top of which 0.5  $\mu$ L of 2,6  
944 dihydroxyacetophenone (DHAP) solution (30 mg/ml in 50% acetonitrile:0.1% formic acid) was  
945 spotted and let dry at room temperature. Crystallized sample was then analyzed using Bruker  
946 Rapiflex® MALDI-TOF MS equipped with a Smartbeam 3D, 10 kHz, 355 nm Nd:YAG laser.  
947 The laser parameters were optimized as follows: scan range = 26  $\mu$ m; number of shots per  
948 sample = 1000; laser frequency = 5000 Hz. The mass spectrometer was calibrated for high-  
949 mass range using Protein A and Trypsinogen standards under Linear Mode. Data were  
950 analyzed using FlexAnalysis software and plotted using Graphpad Prism.

951

#### 952 **In-gel digestion and peptide mass fingerprinting of Cry11Aa using MALDI.**

953 Selected bands were in-gel digested with trypsin as previously described<sup>100</sup>. MALDI mass  
954 spectra of the tryptic peptides were recorded on an Autoflex mass spectrometer (Bruker  
955 Daltonics, Bremen, Germany) in the reflectron positive ion mode. Before analysis samples  
956 were desalted and concentrated on RP-C18 tips (Millipore) and eluted directly with 2  $\mu$ L of  $\alpha$ -  
957 cyano-4-hydroxy cinnamic acid matrix (10 mg/ml in water/acetonitrile/trifluoroacetic acid:  
958 50/50/0.1,  $v/v/v$ ) on the target.

959

#### 960 **In-gel digestion and peptide mass fingerprinting of Cry11Ba using GeLC-MS/MS.**

961 Gel Liquid Chromatography tandem mass spectrometry mass spectra collected on Cry11Ba  
962 were acquired on a ThermoFisher Q-Exactive Plus (UCLA Molecular Instrumentation Center,

963 Los Angeles, CA, USA). Before analysis, the Cry11Ba crystals were diluted at a 1:5 dilution  
964 with ultrapure H<sub>2</sub>O and 4x SDS Loading Buffer Dye. These samples were then boiled for 3  
965 min at 98°C and were loaded on a 4-12% Bis-Tris SDS-PAGE gel. Protein embedded in gel  
966 bands were extracted and digested with 200 ng trypsin at 37°C overnight. The digested  
967 products were extracted from the gel bands in 50% acetonitrile/49.9% H<sub>2</sub>O/ 0.1%  
968 trifluoroacetic acid (TFA) and desalted with C18 StageTips prior to analysis by tandem mass  
969 spectrometry. Peptides were injected on an EASY-Spray HPLC column (25 cm x 75 µm ID,  
970 PepMap RSLC C18, 2 µm, ThermoScientific). Tandem mass spectra were acquired in a data-  
971 dependent manner with a quadrupole orbitrap mass spectrometer (Q-Exactive Plus Thermo  
972 Fisher Scientific) interfaced to a nanoelectrospray ionization source. The raw MS/MS data  
973 were converted into MGF format by Thermo Proteome Discoverer (VER. 1.4, Thermo  
974 Scientific). The MGF files were then analyzed by a MASCOT sequence database search.

975  
976 **Native mass spectrometry.** Crystals of Cry11Aa were centrifuged for 5 minutes at 5000 g  
977 during the buffer wash and washed twice with ammonium acetate buffer (pH adjusted to 6.4  
978 with acetic acid). Pelleted crystals were then dissolved in ammonium acetate buffer (pH  
979 adjusted to 11.5 using ammonium hydroxide). Gold-coated capillary emitters were prepared  
980 as previously described and used to load the protein sample <sup>101</sup>. The sample was analyzed on  
981 a Synapt G1 mass spectrometer (Waters Corporation). The instrument was tuned to preserve  
982 non-covalent interactions. Briefly, the capillary voltage was set to 1.60 kV, the sampling cone  
983 voltage was 20 V, the extraction cone voltage was 5 V, the source temperature was 80 °C, the  
984 trap transfer collision energy was 10V, and the trap collision energy (CE) was set at 30 V. For  
985 MS/MS characterization, a particular charge state was isolated in the quadrupole and the  
986 complex was dissociated by application of 200V of CE. The data collected were deconvoluted  
987 and analyzed using UniDec <sup>102</sup>.

988  
989 **Heat stability and aggregation propensity.** The thermal unfolding of Cry11Aa WT and  
990 mutants was measured by following changes as a function of temperature (15 – 95 °C) in  
991 tryptophan fluorescence leading to an increase of the F350/F330 ratio. Scattering was also  
992 monitored to address aggregation propensity of Cry11Aa WT and of the mutants F17Y,  
993 Y272Q, Y349F, Y449F, D507N-D514N and E583Q (Supplementary Fig. 12). All the  
994 measurements were performed on a Prometheus NT.48 (Nanotemper) following  
995 manufacturer's instructions.

996  
997 **Data availability**

998 Structures and structure factor amplitudes have been deposited in the PDB databank under  
999 accession codes XXXX ("XXXX"; [10.2210/pdbXXXX/pdb]), etc. Raw image files are deposited

1000 in cxi.db accession number 190 (<https://www.cxidb.org/id-190.html>). The source data for Figs.  
1001 XXXXX and for Supplementary Figs. XXXXX are provided as a Source Data file. Other data  
1002 are available from the corresponding author upon reasonable request.

1003

1004

1005 **References**

- 1006 1. Bravo, A., Likitvivatanavong, S., Gill, S. S. & Soberon, M. Bacillus thuringiensis: A story of  
1007 a successful bioinsecticide. *Insect Biochem. Mol. Biol.* **41**, 423–431 (2011).
- 1008 2. Vachon, V., Laprade, R. & Schwartz, J. L. Current models of the mode of action of Bacillus  
1009 thuringiensis insecticidal crystal proteins: a critical review. *J. Invertebr. Pathol.* **111**, 1–12  
1010 (2012).
- 1011 3. Delecluse, A., Rosso, M. L. & Ragni, A. Cloning and expression of a novel toxin gene from  
1012 Bacillus thuringiensis subsp. jegathesan encoding a highly mosquitocidal protein. *Appl*  
1013 *Env. Microbiol* **61**, 4230–5 (1995).
- 1014 4. Federici, B. A., Park, H.-W. & Sakano, Y. Insecticidal Protein Crystals of Bacillus  
1015 thuringiensis. in *Inclusions in Prokaryotes* (ed. Shively, J. M.) 195–236 (Springer, 2006).  
1016 doi:10.1007/7171\_008/Published.
- 1017 5. Boonserm, P., Mo, M., Angsuthanasombat, C. & Lescar, J. Structure of the functional form  
1018 of the mosquito larvicidal Cry4Aa toxin from Bacillus thuringiensis at a 2.8-Angstrom  
1019 resolution. *J. Bacteriol.* **188**, 3391–3401 (2006).
- 1020 6. Boonserm, P., Davis, P., Ellar, D. J. & Li, J. Crystal structure of the mosquito-larvicidal  
1021 toxin Cry4Ba and its biological implications. *J. Mol. Biol.* **348**, 363–382 (2005).
- 1022 7. Cohen, S. *et al.* Cyt1Aa Toxin: Crystal Structure Reveals Implications for Its Membrane-  
1023 Perforating Function. *J. Mol. Biol.* **413**, 804–814 (2011).
- 1024 8. Gutierrez, P., Alzate, O. & Orduz, S. A theoretical model of the tridimensional structure of  
1025 Bacillus thuringiensis subsp. medellin Cry 11Bb toxin deduced by homology modelling.  
1026 *Mem Inst Oswaldo Cruz* **96**, 357–64 (2001).
- 1027 9. Chapman, H. N. *et al.* Femtosecond X-ray protein nanocrystallography. *Nature* **470**, 73–  
1028 77 (2011).
- 1029 10. Schlichting, I. Serial femtosecond crystallography: the first five years. *IUCrJ* **2**, 246–255  
1030 (2015).
- 1031 11. Boutet, S., Fromme, P. & Hunter, M. S. *X-ray Free Electron Lasers - A Revolution in*  
1032 *Structural Biology*. vol. 1 (Springer International Publishing, 2018).
- 1033 12. Tetreau, G. *et al.* Serial femtosecond crystallography on in vivo-grown crystals drives  
1034 elucidation of mosquitocidal Cyt1Aa bioactivation cascade. *Nat. Commun.* **11**, 1153  
1035 (2020).
- 1036 13. Li, J. D., Carroll, J. & Ellar, D. J. Crystal structure of insecticidal delta-endotoxin from  
1037 Bacillus thuringiensis at 2.5 Å resolution. *Nature* **353**, 815–821 (1991).
- 1038 14. Morse, R. J., Yamamoto, T. & Stroud, R. M. Structure of Cry2Aa Suggests an Unexpected  
1039 Receptor Binding Epitope. *Structure* **9**, 409–417 (2001).
- 1040 15. Grochulski, P. *et al.* Bacillus thuringiensis CryIA(a) Insecticidal Toxin: Crystal Structure  
1041 and Channel Formation. *J. Mol. Biol.* **254**, 447–464 (1995).
- 1042 16. Engilberge, S. *et al.* Crystallophore: a versatile lanthanide complex for protein  
1043 crystallography combining nucleating effects, phasing properties, and luminescence.  
1044 *Chem. Sci.* **8**, 5909–5917 (2017).
- 1045 17. Engilberge, S. *et al.* Protein crystal structure determination with the crystallophore, a  
1046 nucleating and phasing agent. *J. Appl. Crystallogr.* **52**, 722–731 (2019).
- 1047 18. Xu, C., Wang, B. C., Yu, Z. & Sun, M. Structural insights into Bacillus thuringiensis Cry,  
1048 Cyt and parasporin toxins. *Toxins* **6**, 2732–70 (2014).
- 1049 19. Promponas, V. J. *et al.* CAST: an iterative algorithm for the complexity analysis of  
1050 sequence tracts. *Bioinformatics* **16**, 915–922 (2000).
- 1051 20. Wootton, J. C. & Federhen, S. Statistics of local complexity in amino acid sequences and  
1052 sequence databases. *Comput. Chem.* **17**, 149–163 (1993).
- 1053 21. Liang, M. *et al.* The Coherent X-ray Imaging instrument at the Linac Coherent Light  
1054 Source. *J. Synchrotron Radiat.* **22**, 514–519 (2015).
- 1055 22. Sierra, R. G. *et al.* Concentric-flow electrokinetic injector enables serial crystallography of  
1056 ribosome and photosystem II. *Nat. Methods* **13**, 59–62 (2016).
- 1057 23. DePonte, D. P. *et al.* Gas dynamic virtual nozzle for generation of microscopic droplet  
1058 streams. *J. Phys. -Appl. Phys.* **41**, 7 (2008).

- 1059 24. Leaver-Fay, A. *et al.* Rosetta3: An Object-Oriented Software Suite for the Simulation and  
1060 Design of Macromolecules. *Methods Enzymol.* **487**, 545–574 (2011).
- 1061 25. Bairoch, A. & Apweiler, R. The SWISS-PROT protein sequence data bank and its  
1062 supplement TrEMBL in 1999. *Nucleic Acids Res.* **27**, 49–54 (1999).
- 1063 26. Pardo-Lopez, L., Soberon, M. & Bravo, A. Bacillus thuringiensis insecticidal three-domain  
1064 Cry toxins: mode of action, insect resistance and consequences for crop protection. *FEMS*  
1065 *Microbiol. Rev.* **37**, 3–22 (2013).
- 1066 27. Krissinel, E., Uski, V., Lebedev, A., Winn, M. & Ballard, C. Distributed computing for  
1067 macromolecular crystallography. *Acta Crystallogr. Sect. Struct. Biol.* **74**, 143–151 (2018).
- 1068 28. Colletier, J.-P. *et al.* De novo phasing with X-ray laser reveals mosquito larvicide BinAB  
1069 structure. *Nature* **539**, 43–47 (2016).
- 1070 29. Oestergaard, J., Ehlers, R. U., Martinez-Ramirez, A. C. & Real, M. D. Binding of Cyt1Aa  
1071 and Cry11Aa toxins of Bacillus thuringiensis serovar israelensis to brush border  
1072 membrane vesicles of Tipula paludosa (Diptera: Nematocera) and subsequent pore  
1073 formation. *Appl. Environ. Microbiol.* **73**, 3623–3629 (2007).
- 1074 30. Yamagiwa, M., Sakagawa, K. & Sakai, H. Functional Analysis of Two Processed  
1075 Fragments of Bacillus thuringiensis Cry11A Toxin. *Biosci. Biotechnol. Biochem.* **68**, 523–  
1076 528 (2014).
- 1077 31. Munoz-Garay, C. *et al.* Oligomerization of Cry11Aa from Bacillus thuringiensis Has an  
1078 Important Role in Toxicity against Aedes aegypti. *Appl. Environ. Microbiol.* **75**, 7548–7550  
1079 (2009).
- 1080 32. Fernandez, L. E. *et al.* Cry11Aa toxin from Bacillus thuringiensis binds its receptor in  
1081 Aedes aegypti mosquito larvae through loop alpha-8 of domain II. *Febs Lett.* **579**, 3508–  
1082 3514 (2005).
- 1083 33. Carmona, D. *et al.* Dominant Negative Phenotype of Bacillus thuringiensis Cry1Ab,  
1084 Cry11Aa and Cry4Ba Mutants Suggest Hetero-Oligomer Formation among Different Cry  
1085 Toxins. *PLoS ONE* **6**, e19952 (2011).
- 1086 34. Du, J. P., Knowles, B. H., Li, J. & Ellar, D. J. Biochemical characterization of Bacillus  
1087 thuringiensis cytolytic toxins in association with a phospholipid bilayer. *Biochem. J.* **338**,  
1088 185–193 (1999).
- 1089 35. Ntountoumi, C. *et al.* Low complexity regions in the proteins of prokaryotes perform  
1090 important functional roles and are highly conserved. *Nucleic Acids Res.* **47**, 9998–10009  
1091 (2019).
- 1092 36. Henrich, B. *et al.* The adaptive gain integrating pixel detector AGIPD a detector for the  
1093 European XFEL. *Nucl. Instrum. Methods Phys. Res. Sect. Accel. Spectrometers Detect.*  
1094 *Assoc. Equip.* **633**, S11–S14 (2011).
- 1095 37. Likitvivanavong, S. *et al.* Multiple Receptors as Targets of Cry Toxins in Mosquitoes. *J.*  
1096 *Agric. Food Chem.* **59**, 2829–2838 (2011).
- 1097 38. Fernandez, L. E., Aimanova, K. G., Gill, S. S., Bravo, A. & Soberon, M. A GPI-anchored  
1098 alkaline phosphatase is a functional midgut receptor of Cry11Aa toxin in Aedes aegypti  
1099 larvae. *Biochem. J.* **394**, 77–84 (2006).
- 1100 39. Bourgouin, C., Delecluse, A. & Rapoport, G. Specificity and Synergism of Bacillus  
1101 thuringiensis israelensis Toxins on Mosquito Larvae. in *Bacterial Protein Toxins* (ed.  
1102 Fehrenbach) 225–226 (Gustav Fisher, 1988).
- 1103 40. Lopez-Diaz, J. A., Emiliano Canton, P., Gill, S. S., Soberon, M. & Bravo, A.  
1104 Oligomerization is a key step in Cyt1Aa membrane insertion and toxicity but not necessary  
1105 to synergize Cry11Aa toxicity in Aedes aegypti larvae. *Environ. Microbiol.* **15**, 3030–3039  
1106 (2013).
- 1107 41. Pérez, C. *et al.* Bacillus thuringiensis subsp. israelensis Cyt1Aa synergizes Cry11Aa toxin  
1108 by functioning as a membrane-bound receptor. *Proc. Natl. Acad. Sci. U. S. A.* **102**, 18303–  
1109 18308 (2005).
- 1110 42. Sawaya, M. R. *et al.* Protein crystal structure obtained at 2.9 Å resolution from injecting  
1111 bacterial cells into an X-ray free-electron laser beam. *Proc. Natl. Acad. Sci.* **111**, 12769–  
1112 12774 (2014).
- 1113 43. Galitsky, N. *et al.* Structure of the insecticidal bacterial delta-endotoxin Cry3Bb1 of Bacillus



- 1114 thuringiensis. *Acta Crystallogr. D Biol. Crystallogr.* **57**, 1101–1109 (2001).
- 1115 44. Adalat, R., Saleem, F., Crickmore, N., Naz, S. & Shakoory, A. R. In Vivo Crystallization of  
1116 Three-Domain Cry Toxins. *Toxins Basel* **9**, (2017).
- 1117 45. Hughes, M. P. *et al.* Atomic structures of low-complexity protein segments reveal kinked  
1118  $\beta$  sheets that assemble networks. *Science* **359**, 698–701 (2018).
- 1119 46. Salinas, N., Colletier, J. P., Moshe, A. & Landau, M. Extreme amyloid polymorphism in  
1120 *Staphylococcus aureus* virulent PSM $\alpha$  peptides. *Nat Commun* **9**, 3512 (2018).
- 1121 47. Sun, Y. *et al.* Construction and characterization of the interdomain chimeras using  
1122 Cry11Aa and Cry11Ba from *Bacillus thuringiensis* and identification of a possible novel  
1123 toxic chimera. *Biotechnol. Lett.* **36**, 105–111 (2013).
- 1124 48. Fernandez, L. E. *et al.* Cry11Aa toxin from *Bacillus thuringiensis* binds its receptor in  
1125 *Aedes aegypti* mosquito larvae through loop alpha-8 of domain II. *Febs Lett.* **579**, 3508–  
1126 3514 (2005).
- 1127 49. Schonherr, R., Rudolph, J. M. & Redecke, L. Protein crystallization in living cells. *Biol*  
1128 *Chem* **399**, 751–772 (2018).
- 1129 50. Baek, M. *et al.* Accurate prediction of protein structures and interactions using a three-  
1130 track neural network. *Science* **373**, 871–876 (2021).
- 1131 51. Jumper, J. *et al.* Highly accurate protein structure prediction with AlphaFold. *Nature* **596**,  
1132 583–589 (2021).
- 1133 52. Cowtan, K. Completion of autobuilt protein models using a database of protein fragments.  
1134 *Acta Crystallogr. D Biol. Crystallogr.* **68**, 328–335 (2012).
- 1135 53. Murshudov, G. N. *et al.* REFMAC5 for the refinement of macromolecular crystal structures.  
1136 *Acta Crystallogr. D Biol. Crystallogr.* **67**, 355–367 (2011).
- 1137 54. Banneville, A.-S. *et al.* Structural and functional characterization of DdrC, a novel DNA  
1138 damage-induced nucleoid associated protein involved in DNA compaction | bioRxiv.  
1139 <https://www.biorxiv.org/content/10.1101/2021.10.27.466113v1?rss=1>.
- 1140 55. Park, H. W., Delecluse, A. & Federici, B. A. Construction and characterization of a  
1141 recombinant *Bacillus thuringiensis* subsp israelensis strain that produces Cry11B. *J.*  
1142 *Invertebr. Pathol.* **78**, 37–44 (2001).
- 1143 56. Wu, D. & Federici, B. A. Improved production of the insecticidal CryIVD protein in *Bacillus*-  
1144 *thuringiensis* using CryLA(c) promoters to express the gene for an associated 20-KDa  
1145 protein. *Appl. Microbiol. Biotechnol.* **42**, 697–702 (1995).
- 1146 57. Kirmizoglou, I. & Promponas, V. J. LCR-eXXXplorer: a web platform to search, visualize  
1147 and share data for low complexity regions in protein sequences. *Bioinformatics* **31**, 2208–  
1148 2210 (2015).
- 1149 58. Girish, V. & Vijayalakshmi, A. Affordable image analysis using NIH Image/ImageJ. *Indian*  
1150 *J Cancer* **41**, 47 (2004).
- 1151 59. Nečas, D. & Klapetek, P. Gwyddion: an open-source software for SPM data analysis.  
1152 *Cent. Eur. J. Phys.* **10**, 181–188 (2012).
- 1153 60. Chen, S. W. & Pellequer, J.-L. DeStripe: frequency-based algorithm for removing stripe  
1154 noises from AFM images. *BMC Struct. Biol.* **11**, 7 (2011).
- 1155 61. Sierra, R. G. *et al.* Concentric-flow electrokinetic injector enables serial crystallography of  
1156 ribosome and photosystem II. *Nat. Methods* **13**, 59–62 (2016).
- 1157 62. Liang, M. *et al.* The Coherent X-ray Imaging instrument at the Linac Coherent Light  
1158 Source. *J. Synchrotron Radiat.* **22**, 514–519 (2015).
- 1159 63. Waterman, D. G. *et al.* Diffraction-geometry refinement in the DIALS framework. *Acta*  
1160 *Crystallogr. Sect. Struct. Biol.* **72**, 558–575 (2016).
- 1161 64. Sauter, N. K., Hattne, J., Grosse-Kunstleve, R. W. & Echols, N. New Python-based  
1162 methods for data processing. *Acta Crystallogr. D Biol. Crystallogr.* **69**, 1274–1282 (2013).
- 1163 65. Hattne, J. *et al.* Accurate macromolecular structures using minimal measurements from  
1164 X-ray free-electron lasers. *Nat. Methods* **11**, 545–548 (2014).
- 1165 66. Winter, G. *et al.* DIALS: implementation and evaluation of a new integration package. *Acta*  
1166 *Crystallogr. Sect. Struct. Biol.* **74**, 85–97 (2018).
- 1167 67. Vagin, A. & Teplyakov, A. MOLREP: an Automated Program for Molecular Replacement.  
1168 *J. Appl. Crystallogr.* **30**, 1022–1025 (1997).

- 1169 68. Leaver-Fay, A. *et al.* ROSETTA3: an object-oriented software suite for the simulation and  
1170 design of macromolecules. *Methods Enzymol.* **487**, 545–574 (2011).
- 1171 69. McCoy, A. J. *et al.* Phaser crystallographic software. *J. Appl. Crystallogr.* **40**, 658–674  
1172 (2007).
- 1173 70. Coquelle, N. *et al.* Raster-scanning serial protein crystallography using micro- and nano-  
1174 focused synchrotron beams. *Acta Crystallogr. D Biol. Crystallogr.* **71**, 1184–1196 (2015).
- 1175 71. Foucar, L. *et al.* CASS—CFEL-ASG software suite. *Comput. Phys. Commun.* **183**, 2207–  
1176 2213 (2012).
- 1177 72. White, T. A. *et al.* Crystallographic data processing for free-electron laser sources. *Acta*  
1178 *Crystallogr. D Biol. Crystallogr.* **69**, 1231–1240 (2013).
- 1179 73. Skubák, P. & Pannu, N. S. Automatic protein structure solution from weak X-ray data. *Nat.*  
1180 *Commun.* **4**, 1–6 (2013).
- 1181 74. Winn, M. D. *et al.* Overview of the CCP4 suite and current developments. *Acta Crystallogr.*  
1182 *D Biol. Crystallogr.* **67**, 235–242 (2011).
- 1183 75. Gevorkov, Y. *et al.* XGANDALF - extended gradient descent algorithm for lattice finding.  
1184 *Acta Crystallogr. Sect. Found. Adv.* **75**, 694–704 (2019).
- 1185 76. Duisenberg, A. J. M. Indexing in single-crystal diffractometry with an obstinate list of  
1186 reflections. *J. Appl. Crystallogr.* **25**, 92–96 (1992).
- 1187 77. Ginn, H. M. *et al.* it TakeTwo: an indexing algorithm suited to still images with known  
1188 crystal parameters. *Acta Crystallogr. Sect. D* **72**, 956–965 (2016).
- 1189 78. Leslie, A. G. W. The integration of macromolecular diffraction data. *Acta Crystallogr. D*  
1190 *Biol. Crystallogr.* **62**, 48–57 (2006).
- 1191 79. White, T. A. *et al.* it CrystFEL: a software suite for snapshot serial crystallography. *J. Appl.*  
1192 *Crystallogr.* **45**, 335–341 (2012).
- 1193 80. Krissinel, E., Uski, V., Lebedev, A., Winn, M. & Ballard, C. Distributed computing for  
1194 macromolecular crystallography. *Acta Crystallogr. Sect. Struct. Biol.* **74**, 143–151 (2018).
- 1195 81. Terwilliger, T. C. *et al.* Iterative model building, structure refinement and density  
1196 modification with the PHENIX AutoBuild wizard. *Acta Crystallogr. D Biol. Crystallogr.* **64**,  
1197 61–69 (2008).
- 1198 82. Emsley, P. & Cowtan, K. Coot: model-building tools for molecular graphics. *Acta*  
1199 *Crystallogr Biol Crystallogr* **60**, 2126–32 (2004).
- 1200 83. Afonine, P. V. *et al.* Towards automated crystallographic structure refinement with  
1201 phenix.refine. *Acta Crystallogr. D Biol. Crystallogr.* **68**, 352–367 (2012).
- 1202 84. Uervirojnangkoorn, M. *et al.* Enabling X-ray free electron laser crystallography for  
1203 challenging biological systems from a limited number of crystals. *eLife* **4**, (2015).
- 1204 85. Blanc, E. *et al.* Refinement of severely incomplete structures with maximum likelihood in  
1205 BUSTER-TNT. *Acta Crystallogr. D Biol. Crystallogr.* **60**, 2210–2221 (2004).
- 1206 86. *The PyMOL Molecular Graphics System.* (Schrödinger, LLC.).
- 1207 87. Bond, C. S. & Schüttelkopf, A. W. ALINE: a WYSIWYG protein-sequence alignment editor  
1208 for publication-quality alignments. *Acta Crystallogr Biol Crystallogr* **65**, 510–2 (2009).
- 1209 88. Krissinel, E. & Henrick, K. Inference of macromolecular assemblies from crystalline state.  
1210 *J. Mol. Biol.* **372**, 774–797 (2007).
- 1211 89. Madeira, F. *et al.* The EMBL-EBI search and sequence analysis tools APIs in 2019.  
1212 *Nucleic Acids Res.* **47**, W636–W641 (2019).
- 1213 90. Krissinel, E. & Henrick, K. Secondary-structure matching (SSM), a new tool for fast protein  
1214 structure alignment in three dimensions. *Acta Crystallogr Biol Crystallogr* **60**, 2256–68  
1215 (2004).
- 1216 91. Gille, C. & Frömmel, C. STRAP: editor for STRuctural Alignments of Proteins.  
1217 *Bioinformatics* **17**, 377–8 (2001).
- 1218 92. Gille, C., Föhling, M., Weyand, B., Wieland, T. & Gille, A. Alignment-Annotator web server:  
1219 rendering and annotating sequence alignments. *Nucleic Acids Res.* **42**, W3–W6 (2014).
- 1220 93. Mirdita, M., Steinegger, M., Breitwieser, F., Söding, J. & Levy Karin, E. Fast and sensitive  
1221 taxonomic assignment to metagenomic contigs. *Bioinformatics* **37**, 3029–3031 (2021).
- 1222 94. Steinegger, M. & Söding, J. MMseqs2 enables sensitive protein sequence searching for  
1223 the analysis of massive data sets. *Nat. Biotechnol.* **35**, 1026–1028 (2017).

- 1224 95. Prakash, A., Jeffryes, M., Bateman, A. & Finn, R. D. The HMMER Web Server for Protein  
1225 Sequence Similarity Search. *Curr. Protoc. Bioinforma.* **60**, 3.15.1-3.15.23 (2017).  
1226 96. Potter, S. C. *et al.* HMMER web server: 2018 update. *Nucleic Acids Res.* **46**, W200–W204  
1227 (2018).  
1228 97. Savi, M. K., Mangamana, E. T., Deguenon, J. M., Hounmenou, C. G. & Kakaï, R. G.  
1229 Determination of Lethal Concentrations Using an R Software Function Integrating the  
1230 Abbott Correction. *J. Agric. Sci. Technol. A* **7**, (2017).  
1231 98. Wheeler, M. W., Park, R. M. & Bailer, A. J. Comparing median lethal concentration values  
1232 using confidence interval overlap or ratio tests. *Env. Toxicol Chem* **25**, 1441–4 (2006).  
1233 99. *R. R: a language and environment for statistical computing.* (R Foundation for Statistical  
1234 Computing, 2011).  
1235 100. Rosenfeld, J., Capdevielle, J., Guillemot, J. C. & Ferrara, P. In-gel digestion of proteins  
1236 for internal sequence analysis after one- or two-dimensional gel electrophoresis. *Anal.*  
1237 *Biochem.* **203**, 173–179 (1992).  
1238 101. Laganowsky, A., Reading, E., Hopper, J. T. S. & Robinson, C. V. Mass spectrometry  
1239 of intact membrane protein complexes. *Nat. Protoc.* **8**, 639–651 (2013).  
1240 102. Marty, M. T. *et al.* Bayesian Deconvolution of Mass and Ion Mobility Spectra: From  
1241 Binary Interactions to Polydisperse Ensembles. *Anal. Chem.* **87**, 4370–4376 (2015).  
1242 103. Kabsch, W. & Sander, C. Dictionary of protein secondary structure: pattern recognition  
1243 of hydrogen-bonded and geometrical features. *Biopolymers* **22**, 2577–2637 (1983).  
1244

1245 **Acknowledgements.** We thank Aline LeRoy for help during experiments with the Nanotemper  
1246 apparatus and Dr. Guy Schoehn for his support. IBS acknowledges integration into the  
1247 Interdisciplinary Research Institute of Grenoble (IRIG, CEA). We thank the LCLS for beamtime  
1248 allocation under proposals cxi0416, L091, P127, P125 and P141, and the EuXFEL for  
1249 beamtime allocation under proposals P2156 and P2545. This work was supported by the  
1250 Agence Nationale de la Recherche (grants ANR-17-CE11-0018-01 and ANR-2018-CE11-  
1251 0005-02 to J.-P.C.), the CNRS (PEPS SASLELX grant to MW) and used the atomic force  
1252 microscopy (AFM) platform at the IBS and the electron microscopy (EM) platform of the  
1253 Grenoble Instruct-ERIC center (ISBG; UMS 3518 CNRS-CEA-UGA-EMBL) within the  
1254 Grenoble Partnership for Structural Biology (PSB). Platform access was supported by FRISBI  
1255 (ANR-10-INBS-05-02) and GRAL, a project of the University Grenoble Alpes graduate school  
1256 (Ecoles Universitaires de Recherche) CBH-EUR-GS (ANR-17-EURE-0003). The EM facility is  
1257 supported by the Auvergne-Rhône-Alpes Region, the Fondation Recherche Medicale (FRM),  
1258 the fonds FEDER and the GIS-Infrastructures en Biologie Sante et Agronomie (IBiSA). Use of  
1259 the LCLS at the Stanford Linear Accelerator Center (SLAC) National Laboratory, is supported  
1260 by the US Department of Energy, Office of Science, and Office of Basic Energy Sciences under  
1261 contract no. DE-AC02-76SF00515. The CXI instrument was funded by the Linac Coherent  
1262 Light Source Ultrafast Science Instruments project, itself funded by the DOE Office of Basic  
1263 Energy Sciences. Parts of the sample injector used at LCLS for this research were funded by  
1264 the National Institute of Health, P41GM103393, formerly P41RR001209. Data processing was  
1265 supported by National Institutes of Health grant GM117126 to N.K.S. N.A.S.'s contributions  
1266 reported in this publication were supported by the Ruth L. Kirschstein National Research  
1267 Service Award of the National Institutes of Health under award number GM007185.

1268

1269

#### 1270 **Author contributions**

1271 G.T., A.-S.B, D.B., E.L., L.D., H.-W.P., B.F. designed and constructed and transformed WT  
1272 and mutants plasmids; G.T., E.A.A., A.-S.B, N.A.S., D.B., N.Z., H.-W.P. and B.F. produced  
1273 crystals *in vivo*; L.S., E.J.C. and M.A.B. performed MALDI-TOF mass spectrometry  
1274 experiments; P.Q. and A.L. performed native MS/MS mass spectrometry experiments; G.T.,  
1275 E.A.A. and N.A.S. performed solubilization assays; E.A.A. performed heat stability assays;  
1276 N.A.S., M. B., W.L.L. and I.G. conducted transmission electron microscopy imaging; G.T.,  
1277 E.A.A., A.-S.B, N.A.S., R.S. and I.S. performed crystal visualization by SEM; G.T., J.-M.T.,  
1278 D.F. and J.-L.P. performed crystal visualization and size measurements by AFM; G.T. and J.-  
1279 L.P. performed the statistical analysis of solubilization data and G.T. and J.-L.P. performed the  
1280 statistical analyses of AFM data; A.-S.B., M.B., M.W. and J.-P.C secured beamtime at the  
1281 ESRF for crystal screening; M.R.S., N.S., J.R., B.F., and D.C. secured beamtime at the APS

1282 for crystal screening; M.R.S., A.-S.B., M.S.H, J.R., M.W., N.K.S., B.F., D.C., I.S., J.-P.C  
1283 secured beamtime at the LCLS for data collection; I.S. and J.P.C. secured beamtime at the  
1284 EuXFEL for data collection; S.E., E.G., A.R., C.C., F.R. and O.M. synthesized TbX-o4; G.T.  
1285 derivatized Cry11Aa crystals for injection at LCLS; G.T., M.R.S., E.A.A., A.-S.B and N.A.S.  
1286 prepared crystals for data collection at XFEL and synchrotrons; R.G.S. developed and  
1287 operated the MESH-on-a-stick injector; R.L.S. and R.B.D. developed the GDVN injector;  
1288 E.A.A., G.S., M.G., G.N.-K., M.K., G.S., M.S., R.L.S. and R.B.D. operated the GDVN injector;  
1289 G.T., M.R.S., E.A.A., A.-S.B, N.A.S., A.S.B., M.G., G.N.-K., M.S.H., M.K., R.G.S., G.S., M.S.,  
1290 I.D.Y., A.G., A.B., S.B., T.M.R.S, J.R., R.L.S., R.B.D., M.W., N.K.S., D.C., I.S. and J-P.C.  
1291 performed serial data collection at the LCLS; G.T., E.A.A., A.-S.B, N.C., M.G., G.N.-K., M.S.H,  
1292 M.K., R.G.S., G.S., A.G., M.H., L.F., J.B., R.B., R.L., A.M., T.R.M.B, R.L.S., R.B.D., I.S. and  
1293 J-P.C. performed serial data collection at the EuXFEL; E.D.Z., N.C., A.S.B., I.D.Y. and N.K.S.  
1294 produced new processing tools or devices; E.D.Z, N.C., A.S.B., A.G., I.D.Y., N.K.S. and J-P.C.  
1295 performed serial data processing; E.D.Z. and J.P.C phased the structural data; M.R.S, E.D.Z,  
1296 N.A.S. and J-P.C. performed atomic model building, refinement and structure interpretation;  
1297 G.T., M.R.S., E.D.Z and J-P.C. prepared figures and tables and wrote the manuscript with  
1298 input from E.A.A., A.-S.B, N.A.S., A.S.B, M.L.G., D.B., S.E., L.S., R.S., W.L.L., J.-L.P. A.L.,  
1299 R.L.S., D.C. and I.S. J.-P.C. designed and coordinated the project.

1300

### 1301 **Competing interests**

1302 The authors declare no competing interests.

1303

1304

### 1305 **Tables**

1306 **Table 1. Data collection and refinement statistics Cry11Aa and Cry11Ba.**

1307 **Table 2. Data collection and refinement statistics of the Cry11Aa mutants.**

1308

1309 **Figures captions :**

1310

1311 **Fig. 1. Crystals and overall fold of Cry11 toxins.** **a-b**, scanning (left; SEM) and transmission  
1312 (middle, right; TEM) electron micrographs of gold plated and negatively-stained Cry11Aa (**a**)  
1313 and Cry11Ba (**b**) crystals, respectively. The right panels show a close-up view of the crystal  
1314 surface. **c**, Cry11Aa crystal structure, depicted as cartoon. Domain I is shown in blue; domain  
1315 II is shown in orange except for the  $\alpha_h\beta_h$ -handle and  $\beta_{pin}$  which are shown in purple and red,  
1316 respectively; domain III is shown in pink. **d**, Topology diagram of a Cry11Aa dimer. Domain I  
1317 is shown in green, except for central helix  $\alpha_5$ , which is shown in blue; domain II is shown in  
1318 magenta, except for the  $\alpha_h\beta_h$ -handle, which is shown in purple; and domain III is shown in  
1319 cyan, respectively. The two monomers in a dimer assemble via the  $\beta_{pin}$ , resulting in the  
1320 formation of a large  $\beta$ -sheet.

1321

1322 **Fig. 2. Monomer interactions in Cry11Aa and Cry11Ba.** **a**, Cry11Aa crystal packing,  
1323 coloured according to sequence (from blue to red) indicating the domain-based assembly; and  
1324 coloured according to tetramer assembly (see panel (**b1325 regions shown in (**b**) (full line) and (**c**) (dashed line). **b**, Cry11Aa tetramer with zoom on each  
1326 of the three interfaces identified by PISA (interface #1, #3 and #6), with the involved residues  
1327 depicted as spheres. For interfaces with hydrogen and/or salt bridges (see g), an additional  
1328 (right) image shows only those residues that make up these interactions. **c**, Cry11Aa crystal  
1329 assembly by interactions between neighbouring tetramers, formed by interface #2, #4 and #5,  
1330 visualized as in **b**. **d**, Cry11Ba crystal packing, coloured as in (**a**). **e**, Cry11Ba tetramer with  
1331 zoom on the interfaces as in (**b**). Interface #6 (between an A-C pair within a single tetramer) is  
1332 absent in Cry11Ba. **f**, Cry11Ba crystal assembly, visualized as in (**c**). As compared to Cry11Aa,  
1333 Cry11Ba crystals contain an additional interface #7 between an A-B pair from two neighbouring  
1334 tetramers. **g**, interface statistics as identified by PISA for Cry11Aa (blue) and Cry11Ba (red).**

1335

1336 **Fig. 3. Point-mutations of Cry11Aa affect the shape, size and pH-sensitivity of *in vivo*-**  
1337 **grown nanocrystals.** **a**, Crystals from mutants exhibit similar sigmoidal patterns of crystal  
1338 solubilization as a function of pH, except F17Y and E583Q that are more and less sensitive to  
1339 pH, respectively. Error bars indicate the standard error of the measurements. **b**, Cry11Aa WT  
1340 and mutants exhibit similar heat stability. As expected, toxins are more stable ( $+ 17.5 \pm 0.3^\circ\text{C}$ )  
1341 in their crystalline than soluble form, irrespective of the mutation. **c**, Visualization of a  
1342 representative crystal for Cry11Aa WT (black) and mutants F17Y (red), Y272Q (brown), Y349F  
1343 (purple), Y449F (blue), D507N-D514N (orange) and E583Q (green) by SEM (scale bar = 500  
1344 nm). **d**, Crystals of Y449F, F17Y and E583Q imaged by AFM were all smaller in length (L),  
1345 width (W), thickness (T) and volume than WT highlighting a perturbation of the intrinsic crystal

1346 organization induced by these mutations. In each graph, the boxes represent the lower and  
1347 upper quartiles around the median. The whiskers indicate the minimum and maximum values.  
1348

1349  
1350  
1351

## Figures

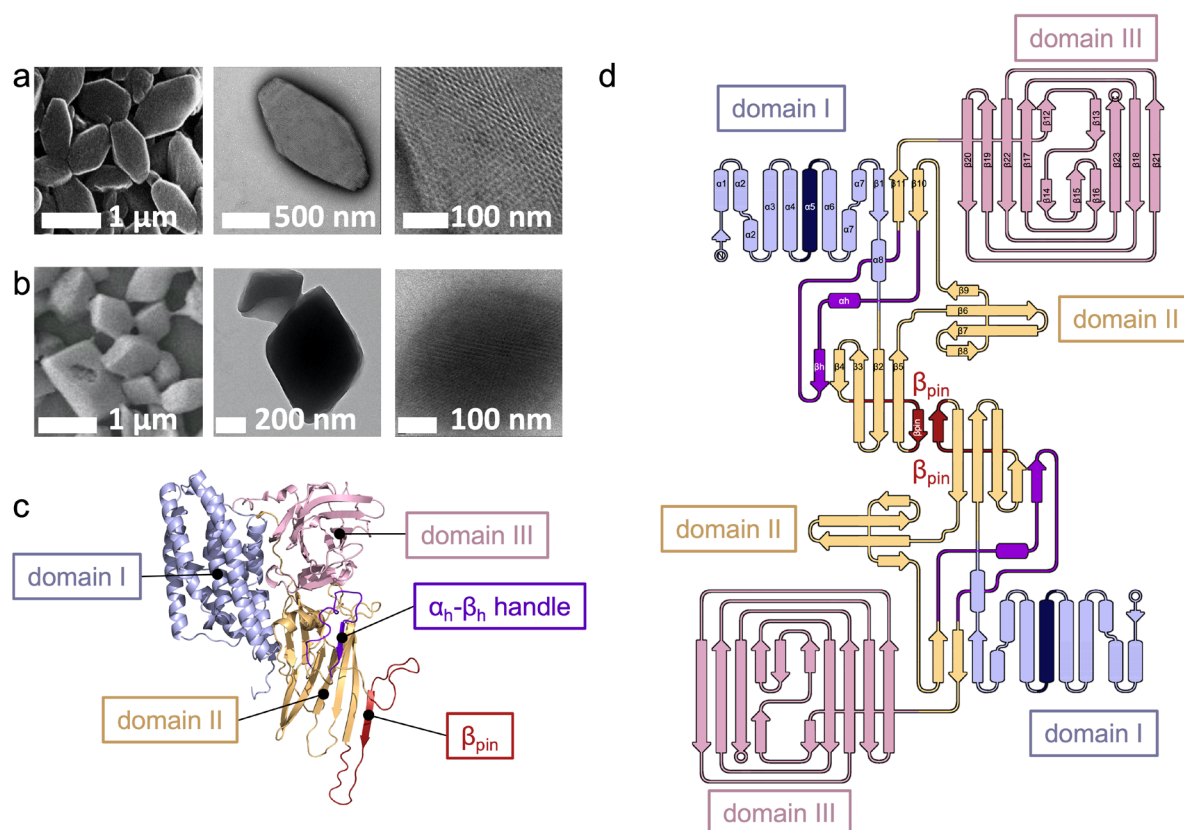

**Fig. 1. Crystals and overall fold of Cry11 toxins.** **a-b**, scanning (left; SEM) and transmission (middle, right; TEM) electron micrographs of gold plated and negatively-stained Cry11Aa (**a**) and Cry11Ba (**b**) crystals, respectively. The right panels shows a close-up view of the crystal surface. **c**, Cry11Aa crystal structure, depicted as cartoon. Domain I is shown in blue; domain II is shown in orange except for the  $\alpha_h\beta_h$ -handle and  $\beta_{pin}$  which are shown in purple and red, respectively; domain III is shown in pink. **d**, Topology diagram of a Cry11Aa dimer. Domain I is shown in green, except for central helix  $\alpha_5$ , which is shown in blue; domain II is shown in magenta, except for the  $\alpha_h\beta_h$ -handle, which is shown in purple; and domain III is shown in cyan, respectively. The two monomers in a dimer assemble via the  $\beta_{pin}$ , resulting in the formation of a large  $\beta$ -sheet.

1352  
1353



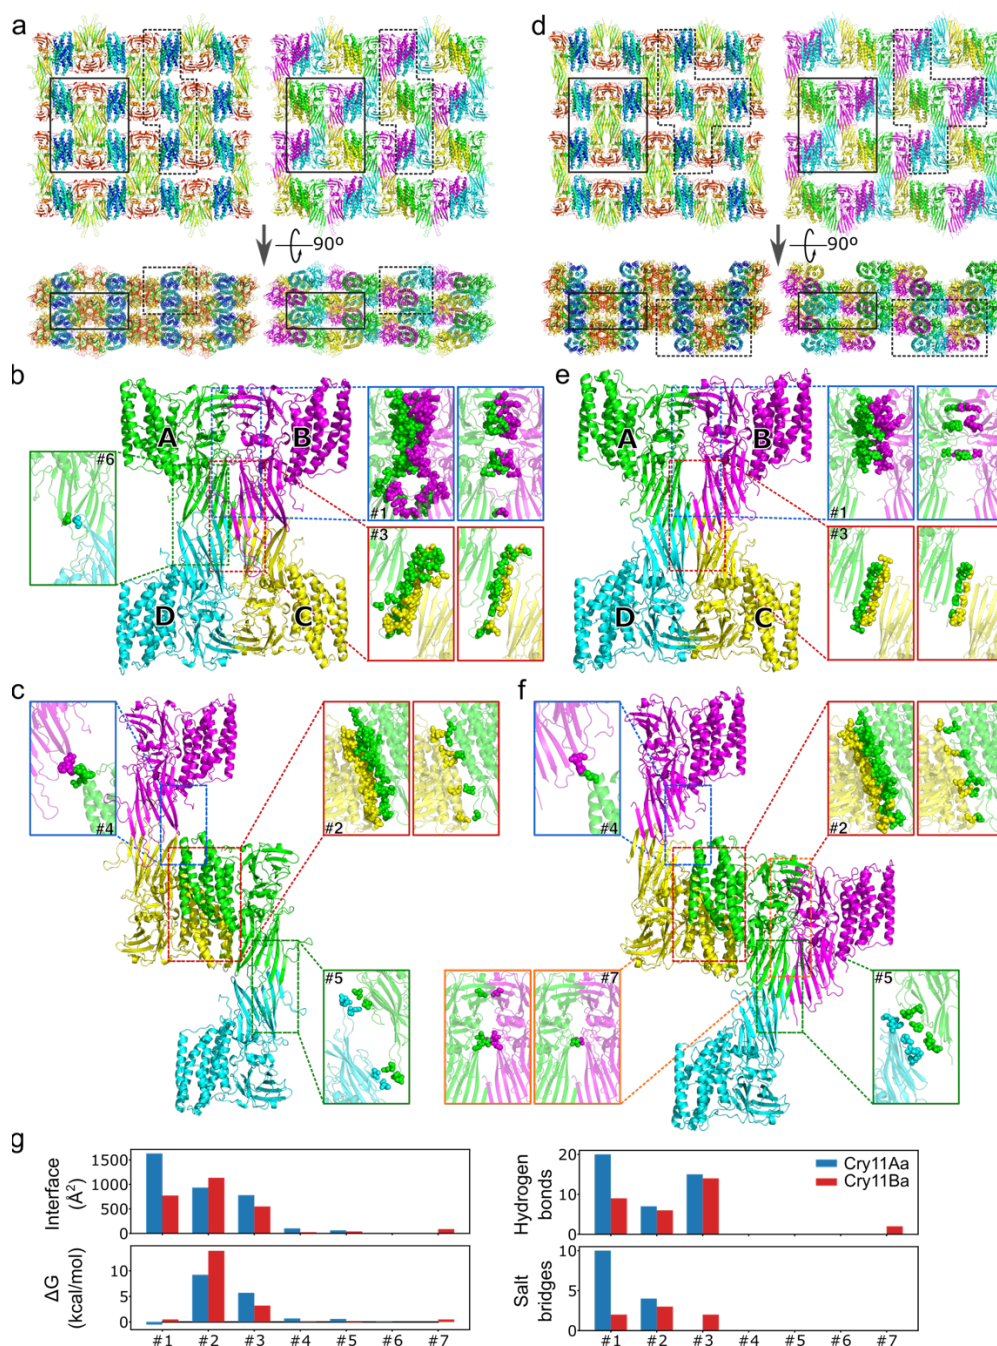

**Fig. 2. Monomer interactions in Cry11Aa and Cry11Ba.** **a**, Cry11Aa crystal packing, coloured according to sequence (from blue to red) indicating the domain-based assembly; and coloured according to tetramer assembly (see panel **b**). The highlighted areas indicate the regions shown in **(b)** (full line) and **(c)** (dashed line). **b**, Cry11Aa tetramer with zoom on each of the three interfaces identified by PISA (interface #1, #3 and #6), with the involved residues depicted as spheres. For interfaces with hydrogen and/or salt bridges (see **g**), an additional (right) image shows only those residues that make up these interactions. **c**, Cry11Aa crystal assembly by interactions between neighbouring tetramers, formed by interface #2, #4 and #5, visualized as in **b**. **d**, Cry11Ba crystal packing, coloured as in **(a)**. **e**, Cry11Ba tetramer with zoom on the interfaces as in **(b)**. Interface #6 (between an A-C pair within a single tetramer) is absent in Cry11Ba. **f**, Cry11Ba crystal assembly, visualized as in **(c)**. As compared to Cry11Aa, Cry11Ba crystals contain an additional interface #7 between an A-B pair from two neighbouring tetramers. **g**, interface statistics as identified by PISA for Cry11Aa (blue) and Cry11Ba (red).

1354

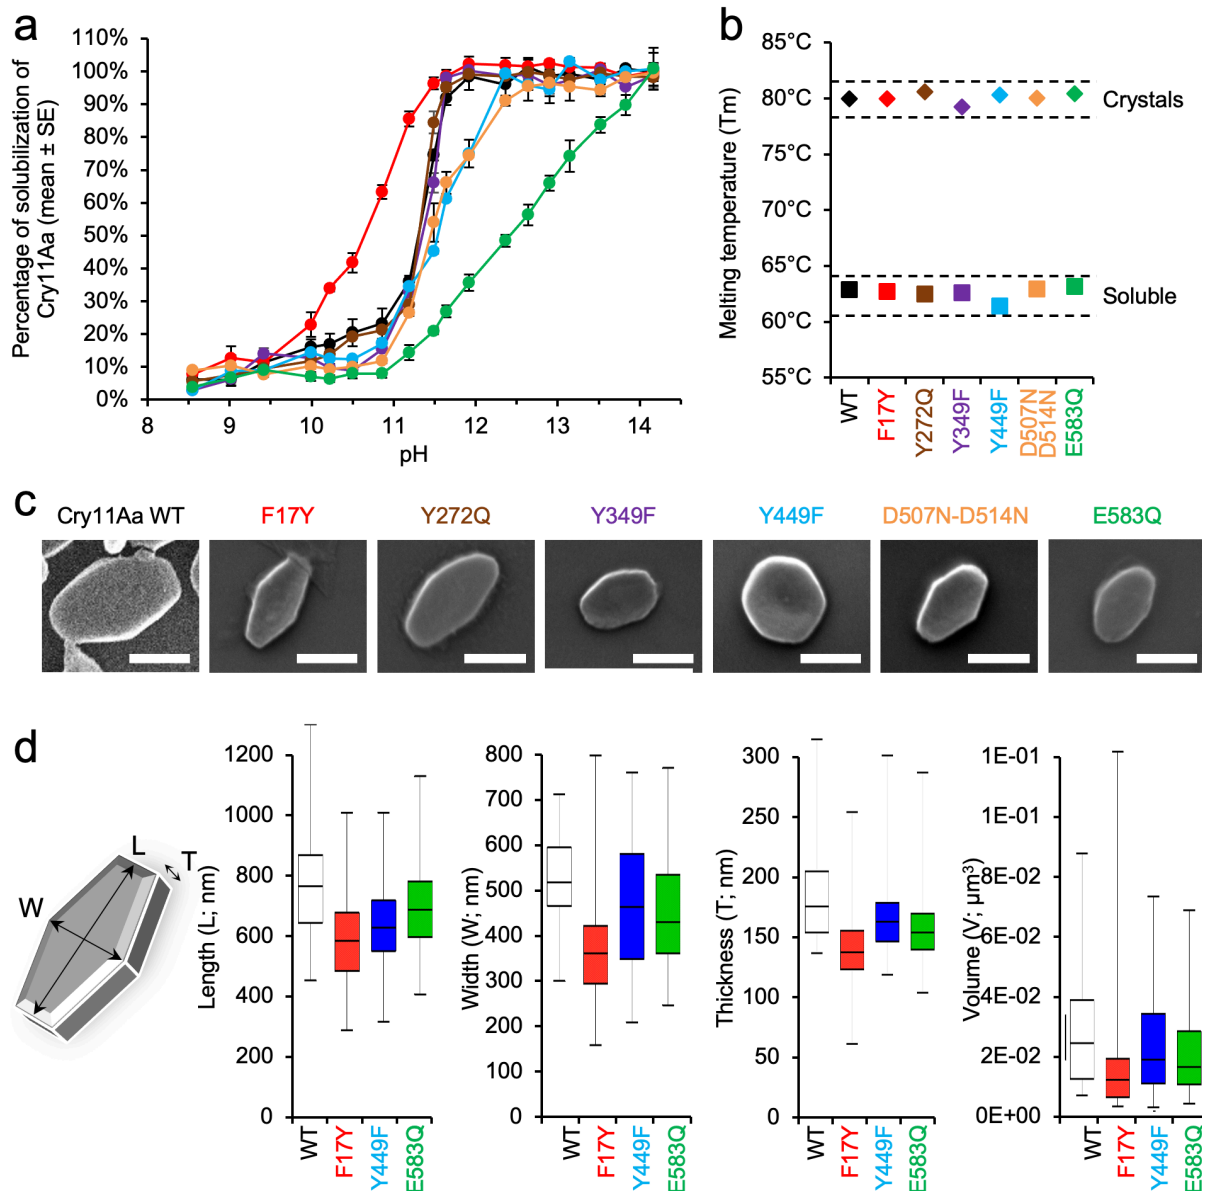

**Fig. 3. Point-mutations of Cry11Aa affect the shape, size and pH-sensitivity of *in vivo*-grown nanocrystals.** **a**, Crystals from mutants exhibit similar sigmoidal patterns of crystal solubilization as a function of pH, except F17Y and E583Q that are more and less sensitive to pH, respectively. Error bars indicate the standard error of the measurements. **b**, Cry11Aa WT and mutants exhibit similar heat stability. As expected, toxins are more stable ( $+ 17.5 \pm 0.3^\circ\text{C}$ ) in their crystalline than soluble form, irrespective of the mutation. **c**, Visualization of a representative crystal for Cry11Aa WT (black) and mutants F17Y (red), Y272Q (brown), Y349F (purple), Y449F (blue), D507N-D514N (orange) and E583Q (green) by SEM (scale bar = 500 nm). **d**, Crystals of Y449F, F17Y and E583Q imaged by AFM were all smaller in length (L), width (W), thickness (T) and volume than WT highlighting a perturbation of the intrinsic crystal organization induced by these mutations. In each graph, the boxes represent the lower and upper quartiles around the median. The whiskers indicate the minimum and maximum values.

1355

1356

1357

|                                                                                                     | <b>Cry11Aa<br/>pH 7</b>       | <b>Cry11Aa-TBXO4<br/>pH7</b>  | <b>Cry11Ba<br/>pH 6.5</b>                | <b>Cry11Ba<br/>pH 10.4</b>               |
|-----------------------------------------------------------------------------------------------------|-------------------------------|-------------------------------|------------------------------------------|------------------------------------------|
| <b>PDB ID</b>                                                                                       |                               |                               |                                          |                                          |
| <b>Data collection</b>                                                                              |                               |                               |                                          |                                          |
| Space group                                                                                         | <i>I</i> 2 2 2                | <i>I</i> 2 2 2                | <i>P</i> 2 <sub>1</sub> 2 <sub>1</sub> 2 | <i>P</i> 2 <sub>1</sub> 2 <sub>1</sub> 2 |
| Cell dimensions (Å)                                                                                 | 57.64 ± 0.19                  | 57.64 ± 0.15                  | 168.19 ± 0.42                            | 167.50 ± 0.29                            |
|                                                                                                     | 155.69 ± 0.80                 | 156.29 ± 0.73                 | 158.46 ± 0.58                            | 157.99 ± 0.47                            |
|                                                                                                     | 171.14 ± 0.54                 | 170.75 ± 0.40                 | 57.54 ± 0.17                             | 57.43 ± 0.14                             |
| Wavelength (Å)                                                                                      | 1.27                          | 1.27                          | 1.30                                     | 1.30                                     |
| X-ray beam focus (µm)                                                                               | 5                             | 5                             | 1                                        | 1                                        |
| No. collected frames                                                                                | 792623                        | 558747                        | 813133                                   | 990643                                   |
| No. indexed frames                                                                                  | 48652                         | 77373                         | 15344                                    | 15689                                    |
| No. merged crystals                                                                                 | 50613                         | 88511                         | 15344                                    | 15689                                    |
| Resolution range (Å)                                                                                | 33.55 – 2.60<br>(2.66 – 2.60) | 33.51 – 2.55<br>(2.61 – 2.55) | 44.86 – 2.30<br>(2.34 – 2.30)            | 35.72 – 2.55<br>(2.59 – 2.55)            |
| No. observations                                                                                    | 8253629 (365007)              | 14069217 (640046)             | 5209917 (99845)                          | 3747530 (52399)                          |
| No. unique reflections                                                                              | 24198 (1583)                  | 48634 (3297)                  | 69286 (3380)                             | 50646 (2488)                             |
| <I/σ (I)>                                                                                           | 9.50 (1.16)                   | 11.23 (1.62)                  | 5.43 (2.84)                              | 3.65 (0.84)                              |
| R <sub>split</sub> (%)                                                                              | 10.73 (95.40)                 | 7.97 (70.58)                  | 14.88 (29.08)                            | 24.50 (97.10)                            |
| CC <sub>1/2</sub>                                                                                   | 1.00 (0.38)                   | 1.00 (0.68)                   | 0.966 (0.207)                            | 0.984 (0.082)                            |
| Completeness (%)                                                                                    | 99.9 (100.0)                  | 100.0 (100.0)                 | 100.0 (100.0)                            | 99.4 (100.0)                             |
| Multiplicity                                                                                        | 341.09 (230.58)               | 289.29 (194.13)               | 75.19 (29.54)                            | 71.34 (21.01)                            |
| <b>Anomalous data</b>                                                                               |                               |                               |                                          |                                          |
| Completeness (%)                                                                                    |                               | 100.0 (100.0)                 |                                          |                                          |
| CCano                                                                                               |                               | 0.26 (0.00)                   |                                          |                                          |
| CRDano                                                                                              |                               | 1.35 (1.01)                   |                                          |                                          |
| <b>Refinement</b>                                                                                   |                               |                               |                                          |                                          |
| Resolution range (Å)                                                                                | 33.55 – 2.60<br>(2.70 – 2.60) |                               | 44.86 – 2.30<br>(2.38 – 2.30)            | 35.72 – 2.55<br>(2.61 – 2.55)            |
| No. reflections                                                                                     | 24196                         |                               | 69256 (6810)                             | 50657 (1996)                             |
| R <sub>work</sub> /R <sub>free</sub> *                                                              | 17.2 / 24.1                   |                               | 20.5 / 24.0                              | 23.8 / 19.2                              |
| No. atoms                                                                                           |                               |                               |                                          |                                          |
| Protein                                                                                             | 5080                          |                               | 9846                                     | 9961                                     |
| Water                                                                                               | 261                           |                               | 50                                       | 98                                       |
| B-factors (Å <sup>2</sup> )                                                                         |                               |                               |                                          |                                          |
| Main chain                                                                                          | 50.47                         |                               | 11.21 / 12.19 <sup>§</sup>               | 41.02 / 42.58                            |
| Side chain                                                                                          | 51.44                         |                               | 17.05 / 17.53                            | 43.26 / 44.59                            |
| Water                                                                                               | 46.17                         |                               | 4.55                                     | 40.04                                    |
| R.m.s.d.                                                                                            |                               |                               |                                          |                                          |
| Bonds lengths (Å)                                                                                   | 0.004                         |                               | 0.010                                    | 0.009                                    |
| Bonds angles (°)                                                                                    | 0.633                         |                               | 1.120                                    | 1.590                                    |
| * R <sub>free</sub> is calculated using 5 and 10% % of random reflections excluded from refinement. |                               |                               |                                          |                                          |
| <sup>§</sup> Average B-factor for chain A / chain B                                                 |                               |                               |                                          |                                          |

**Table 2. Data collection and refinement statistics of the Cry11Aa mutants.**

|                                        | <b>Cry11Aa-F17Y<br/>pH 7</b>   | <b>Cry11Aa-Y449F<br/>pH 7</b>  | <b>Cry11Aa-E583Q<br/>pH 7</b>  |
|----------------------------------------|--------------------------------|--------------------------------|--------------------------------|
| <b>PDB ID</b>                          |                                |                                |                                |
| <b>Data collection</b>                 |                                |                                |                                |
| Space group                            | <i>I</i> 2 2 2                 | <i>I</i> 2 2 2                 | <i>I</i> 2 2 2                 |
|                                        | 57.72 ± 0.35                   | 57.73 ± 0.24                   | 57.76 ± 0.24                   |
| Cell dimensions (Å)                    | 155.39 ± 1.49<br>171.66 ± 0.64 | 155.55 ± 1.21<br>171.52 ± 0.57 | 155.51 ± 0.98<br>171.51 ± 0.58 |
| Wavelength (Å)                         | 1.33                           | 1.33                           | 1.33                           |
| X-ray beam focus (μm)                  | 1.3                            | 1.3                            | 1.3                            |
| No. collected frames                   | 3150500                        | 5993679                        | 3523741                        |
| No. indexed frames                     | 28227                          | 104359                         | 21833                          |
| No. merged crystals                    | 28811                          | 111014                         | 22760                          |
| Resolution range (Å)                   | 23.17 – 3.40<br>(3.40 – 3.48)  | 23.78 – 3.10<br>(3.10 – 3.17)  | 23.50 – 3.30<br>(3.30 – 3.38)  |
| No. observations                       | 2908715 (141787)               | 20279640 (1092683)             | 3210163 (154933)               |
| No. unique reflections                 | 10990 (707)                    | 14447 (950)                    | 12014 (787)                    |
| <I/σ (I)>                              | 6.31 (1.67)                    | 9.95 (1.35)                    | 5.64 (1.52)                    |
| R <sub>split</sub> (%)                 | 19.74 (76.86)                  | 11.79 (89.56)                  | 21.11 (80.18)                  |
| CC <sub>1/2</sub>                      | 0.96 (0.21)                    | 1.00 (0.60)                    | 0.99 (0.31)                    |
| Completeness (%)                       | 99.6 (100.0)                   | 99.7 (100.0)                   | 99.6 (100.0)                   |
| Multiplicity                           | 265.7 (200.5)                  | 1403.7 (1150.2)                | 267.2 (196.8)                  |
| <b>Refinement</b>                      |                                |                                |                                |
| Resolution range (Å)                   | 23.17 – 3.40                   | 23.18 – 3.10                   | 23.08 – 3.30                   |
| No. reflections                        | 10986                          | 14442                          | 12008                          |
| R <sub>work</sub> /R <sub>free</sub> * | 21.2 / 25.1                    | 22.4 / 25.2                    | 21.5 / 25.4                    |
| No. atoms                              |                                |                                |                                |
| Protein                                | 4970                           | 4965                           | 4970                           |
| Water                                  | 5                              | 13                             | 6                              |
| B-factors (Å <sup>2</sup> )            |                                |                                |                                |
| Main chain                             | 54.6                           | 43.1                           | 45.4                           |
| Side chain                             | 54.2                           | 42.7                           | 45.3                           |
| Water                                  | 52.9                           | 59.3                           | 36.0                           |
| R.m.s.d.                               |                                |                                |                                |
| Bonds lengths (Å)                      | 0.002                          | 0.002                          | 0.003                          |
| Bonds angles (°)                       | 0.448                          | 0.441                          | 0.489                          |

\* R<sub>free</sub> is calculated using 5% of random reflections excluded from refinement.
